# Supplementary material
Source: PubMed Central journal article supplement (PMC3399777)
Supplement: NIHMS49056-supplement-Supplementary_Material.pdf [file NIHMS49056-supplement-Supplementary_Material.pdf]

## Supplementary Material for

# **The Fission Yeast FANCM Ortholog Directs Non-Crossover Recombination During Meiosis**

Alexander Lorenz, Fekret Osman, Weili Sun, Saikat Nandi, Roland Steinacher,  
Matthew C. Whitby\*

\*To whom correspondence should be addressed. E-mail: [matthew.whitby@bioch.ox.ac.uk](mailto:matthew.whitby@bioch.ox.ac.uk)

Published in final edited form as:

*Science*. 2012 June 22; 336 (6088):1585-1588. doi: 10.1126/science.1220111

### **This PDF file includes:**

Materials and Methods

Figs. S1 to S5

Tables S1 to S10

References (21–36)

## METHODS

**Yeast strains and plasmid construction.** *Schizosaccharomyces pombe* strains used for this study are listed in Table S10. Yeast cells were cultured in YES broth and on YES plates, unless they contained plasmids, in which case the cells were grown in PMG broth and on PMG (or EMMG in the case of fig. S5) agar plates containing the required supplements (concentration ~250 µg/ml). Sporulation of crosses were performed on ME agar, except for crosses with strains containing plasmids, which were done on SPAS agar supplemented with the required amino acids (concentration ~50 µg/ml). Determination of spore viability by random spore analysis and the meiotic recombination assay have been previously described in detail (12, 17, 21, 22).

The *sfr1* gene was deleted in strain ALP729 using *natMX4* as the selectable marker, by cloning up- and downstream flanking sequences of *sfr1* into pAG25 (23). This construct removes the complete open reading frame except for 6 nucleotides at the 5' end. The resulting strain was verified by PCR and genotoxin testing. For *dmc1* the *ura4<sup>+</sup>* gene in an already existing *dmc1Δ::ura4<sup>+</sup>* strain was targeted with a construct carrying the *natMX4* marker from pAG25, from this transformation clonNAT-resistant Ura<sup>-</sup> colonies were selected.

All plasmids used in this study have been verified by sequencing. Plasmids pREP41 (24), pFml1<sup>+</sup> (pMW848, pREP41-Fml1) (6), pFml1<sup>++</sup> (pALo64, pREP1-Fml1; the *fml1* open reading frame was excised from pMW848 as a Sall-SmaI fragment and cloned into pREP1), pFml1-K99R (pALo70, pREP1-Fml1-K99R; introducing an A296G point mutation into *fml1* using QuikChange XL site-directed mutagenesis, Agilent Technologies, CA), pFml1-D196N (pALo71, pREP1-Fml1-D196N; introducing a G586A point mutation into *fml1* using QuikChange XL site-directed mutagenesis), pFbh1<sup>+</sup> (pMW637, pREP41-Fbh1) (25), pSrs2<sup>+</sup> (pIJ9, pREP41-Srs2) (25), pRqh1<sup>+</sup> (pMW563, pREP41-Rqh1) (18), pFml2<sup>+</sup> (pMW849, pREP41-Fml2; the *fml2* open reading frame was amplified from genomic DNA and cloned as NdeI-BamHI fragment into pREP41), pRusA (pMW437, pREP1-NLS-RusA-GFP) (26), pMus81\* (pMW592, pREP41-2myc6his-Mus81-Pk-Eme1) (17), pGEN1<sup>+</sup> (pALo52, pREP41-GEN1<sup>(1-527)</sup>) (18), and pGEN1<sup>++</sup> (pALo61, pREP1-GEN1<sup>(1-527)</sup>); the GEN1<sup>(1-527)</sup> sequence was excised from pALo52 as a BamHI-NcoI fragment and cloned into pREP1) were transformed into fission yeast strains FO808, FO1260, FO1267, MCW1221, MCW1237, MCW1238, MCW3202/ALP733, MCW3514/ALP802, MCW4994/ALP1170, and MCW5169/ALP1267, and the resulting strains tested for spore viability and in the meiotic recombination assay. Note that in our experiments with GEN1 we use an active truncated form (GEN1<sup>1-527</sup>) because it expresses well in *S. pombe* and has been characterized extensively in vitro (18, 27, 28).

**Meiotic time courses, microscopy and gel electrophoresis of crossover DNA products.** The protocol for azygotic and *pat1-114* diploid meiotic time courses has been described in detail (29). Samples of each time course were fixed in 70% ethanol, stained with Hoechst 33342 and their meiotic progression was checked by assessing the relative numbers of uni-nucleate, horsetail, and multi-nucleate cells in 60 minute intervals. Spreading of nuclei and subsequent processing was performed as described previously (29). For immunostaining rabbit  $\alpha$ -Rec10 (30) and mouse  $\alpha$ -c-Myc (Sigma-Aldrich Company Ltd., Dorset, UK) antibodies were used. All analysis was performed using an Olympus BX50 epifluorescence microscope equipped with the appropriate filter sets to detect red, green, and blue fluorescence (Chroma Technology Corp., VT). Black-and-white images were taken with a CoolSNAP HQ<sup>2</sup> CCD camera (Photometrics, AZ) steered by MetaMorph software (v7.7.3.0, Molecular Devices Inc., CA). Images were pseudo-coloured and overlaid using Adobe Photosop CS5 (v12.0, Adobe Systems Inc., CA). Physical analysis of crossover products at *mbx1* was performed as outlined previously (31).

**D loop binding and unwinding assays.** We have been unable to purify full-length Fml1 and therefore for biochemical assays active C-terminally truncated forms of Fml1, Fml1-K99R, and Fml1-D196N were purified and tested for D loop binding and unwinding as described (6). Binding reactions (20  $\mu$ l) contained 0.5 nM labeled D loop in binding buffer (50 mM Tris-HCl, pH 8.0, 1 mM DTT, 100  $\mu$ g/ml BSA, 6% glycerol). Reactions were started by addition of protein and incubated for 15 minutes on ice before resolving bound and unbound DNA on a 4% native polyacrylamide gel in low ionic strength buffer (6.7 mM Tris-HCl, pH 8.0, 3.3 mM sodium acetate, 2 mM EDTA). Unwinding reactions (20  $\mu$ l) contained 0.5 nM labeled D loop in binding buffer plus 2.5 mM MgCl<sub>2</sub> and 5 mM ATP. Reactions were started by addition of protein and incubated for 30 minutes at 37 °C before being stopped by adding 5  $\mu$ l of stop mix (2.5% SDS, 200 mM EDTA, 10 mg/ml proteinase K) and further incubation at 37 °C for 15 minutes to deproteinize the mixture. Products were analyzed by electrophoresis through a 10% native polyacrylamide gel in 1 x TBE buffer. Gels were dried on 3 MM Whatman paper and analyzed with a Fuji FLA3000 PhosphorImager (Fujifilm Corp., Japan).

**Statistics.** Statistical analysis for the recombination data was performed in Excel (Microsoft Office), in G\*Power 3.1.3 (Department of Psychology, Heinrich-Heine-University Düsseldorf, Germany) and on <http://www.socr.ucla.edu/SOCR.html> (University of California, Los Angeles). First each data set was tested for normal distribution using a Shapiro-

Wilk test (<http://dittami.gmxhome.de/shapiro/>), rejecting the null hypothesis ( $H_0$ ; 'data fits a normal distribution') at an  $\alpha$ -level of  $p < 0.05$ . Several data sets did not conform to a normal distribution and therefore all comparisons were done using a two-tailed, two independent sample Wilcoxon rank-sum test (a.k.a. Mann-Whitney U test). This test is non-parametric and does not depend on data sets being normally distributed. The  $P$  values of tests against the appropriate wild-type controls are presented in Supplementary Tables S1, S2, S3, S4, and S9. The  $P$  values of the Fisher's exact test in Table S7 are given for a comparison with the *mus81* $\Delta$  cross and were calculated at a statistical power of  $1 - \beta > 0.95$ .  $H_0$  ('data sets being similar') was rejected at an  $\alpha$ -level  $P < 0.1$ . In Figs. 1B-D, 2C, 3A, and 4B  $P < 0.01$  is indicated by three asterisks,  $P > 0.01 < 0.05$  by two, and  $P > 0.05 < 0.1$  by one.

## SUPPLEMENT

**Table S1.** Frequency of gene conversion and crossing over in the *ura4<sup>+</sup>-aim2 – ade6 – his3<sup>+</sup>-aim* interval. The values are the means from *n* independent crosses and the values in brackets are the standard deviations. The number of Ade<sup>+</sup> recombinants tested is indicated, as is the total number of viable spores analyzed for crossing over between *ura4<sup>+</sup>-aim2* and *his3<sup>+</sup>-aim*. *ade6-M26* is a known hot spot for recombination and therefore acts predominantly as a recipient of genetic information, this and the order of markers explains the disparity between P1/R1 and P2/R2 classes. CentiMorgan (cM) are calculated from the accumulated data of the independent crosses, not from the mean values, using the mapping function of Haldane. *P* values are calculated by a two-tailed Mann-Whitney U test against the data from the wild-type cross (MCW1196 × MCW1195).

| Cross                   |                                |          | % ade <sup>+</sup>                 |                         |                                            |                                            |                                            |                                            | Crossovers (CO) |                                |                    |
|-------------------------|--------------------------------|----------|------------------------------------|-------------------------|--------------------------------------------|--------------------------------------------|--------------------------------------------|--------------------------------------------|-----------------|--------------------------------|--------------------|
| strain                  | genotype                       | <i>n</i> | Frequency of ade <sup>+</sup> in % | ade <sup>+</sup> tested | <i>ura<sup>+</sup>his<sup>+</sup></i> (P1) | <i>ura<sup>+</sup>his<sup>-</sup></i> (P2) | <i>ura<sup>-</sup>his<sup>-</sup></i> (R1) | <i>ura<sup>+</sup>his<sup>+</sup></i> (R2) | tested          | Frequency of CO in %           | cM                 |
| MCW1196<br>×<br>MCW1195 | wild type                      | 20       | 0.304<br>(0.108)                   | 3,501                   | 6.58<br>(2.57)                             | 31.64<br>(5.92)                            | 57.28<br>(6.11)                            | 4.5<br>(3.01)                              | 5,562           | 12.702<br>(3.94)               | 14.69              |
| MCW1832<br>×<br>MCW1785 | <i>fbh1Δ</i> <sup>§</sup>      | 18       | 0.785 <sup>a,§</sup><br>(0.263)    | 1,392                   | 11.63 <sup>b</sup><br>(5.45)               | 32.0 <sup>b</sup><br>(5.2)                 | 49.07 <sup>b</sup><br>(7.74)               | 7.3 <sup>b</sup><br>(3.4)                  | 1,703           | 16.988 <sup>c</sup><br>(7.152) | 21.72 <sup>§</sup> |
| FO1360<br>×<br>FO1368   | <i>rqh1Δ</i>                   | 15       | 0.024 <sup>d</sup><br>(0.006)      | 718                     | 7.72 <sup>e</sup><br>(2.61)                | 27.33 <sup>e</sup><br>(6.22)               | 59.43 <sup>e</sup><br>(5.56)               | 5.52 <sup>e</sup><br>(3.31)                | 2,044           | 3.09 <sup>f</sup><br>(1.039)   | 3.13               |
| FO1346<br>×<br>FO1354   | <i>srs2Δ</i>                   | 10       | 0.258 <sup>g</sup><br>(0.048)      | 1,867                   | 5.06 <sup>h</sup><br>(1.29)                | 32.39 <sup>h</sup><br>(3.44)               | 60.08 <sup>h</sup><br>(4.63)               | 2.47 <sup>h</sup><br>(1.08)                | 1,437           | 8.387 <sup>i</sup><br>(1.449)  | 9.22               |
| MCW3187<br>×<br>MCW3185 | <i>fml1Δ</i>                   | 7        | 0.235 <sup>j</sup><br>(0.093)      | 1,142                   | 10.79 <sup>k</sup><br>(4.03)               | 19.23 <sup>k</sup><br>(3.88)               | 67.56 <sup>k</sup><br>(6.32)               | 2.42 <sup>k</sup><br>(1.42)                | 2,663           | 14.895 <sup>l</sup><br>(2.829) | 18.08              |
| MCW3189<br>×<br>MCW3186 | <i>fml2Δ</i>                   | 8        | 0.136 <sup>m</sup><br>(0.029)      | 582                     | 7.34 <sup>n</sup><br>(2.64)                | 29.45 <sup>n</sup><br>(3.15)               | 61.04 <sup>n</sup><br>(3.36)               | 2.17 <sup>n</sup><br>(1.42)                | 3,734           | 11.031 <sup>o</sup><br>(1.517) | 11.85              |
| MCW3183<br>×<br>MCW3182 | <i>fml1Δfml2Δ</i> <sup>†</sup> | 8        | 0.217 <sup>p</sup><br>(0.087)      | 1,219                   | 11.88 <sup>q</sup><br>(3.37)               | 18.56 <sup>q</sup><br>(5.99)               | 67.06 <sup>q</sup><br>(8.69)               | 2.5 <sup>q</sup><br>(2.32)                 | 3,426           | 14.366 <sup>r</sup><br>(3.516) | 16.81              |

<sup>a</sup> *P* = 1.885 × 10<sup>-6</sup>, highly significant; <sup>b</sup> *P* = 0.027, significant at an  $\alpha$ -level of 0.05; <sup>c</sup> *P* = 0.019, significant at an  $\alpha$ -level of 0.05.

<sup>d</sup> *P* = 5.733 × 10<sup>-7</sup>, highly significant; <sup>e</sup> *P* = 0.177, not significant; <sup>f</sup> *P* = 5.733 × 10<sup>-7</sup>, highly significant.

<sup>g</sup> *P* = 0.312, not significant; <sup>h</sup> *P* = 0.725, not significant; <sup>i</sup> *P* = 2.073 × 10<sup>-3</sup>, highly significant.

<sup>j</sup> *P* = 0.143, not significant; <sup>k</sup> *P* = 9.311 × 10<sup>-3</sup>, highly significant; <sup>l</sup> *P* = 0.121, not significant.

<sup>m</sup> *P* = 1.367 × 10<sup>-4</sup>, highly significant; <sup>n</sup> *P* = 0.286, not significant; <sup>o</sup> *P* = 0.416, not significant.

<sup>p</sup> *P* = 0.067, significant at an  $\alpha$ -level of 0.1; <sup>q</sup> *P* = 3.747 × 10<sup>-3</sup>, highly significant; <sup>r</sup> *P* = 0.242, not significant.

<sup>§</sup> data from Ref. (2), overall the GC and the CO frequencies are increased in *fbh1Δ* compared to wild type, something that was not as pronounced, especially for the COs, in our previous data set (2). This increase in GC and CO could be caused by either more DSBs or by changes in the interhomolog bias (similar to what has been suggested for RTEL-1 (20)). Previously, *fbh1Δ* has been shown to have poor spore viability, therefore we cannot discount the possibility that it has an effect on the CO/NCO decision during meiosis (2).

<sup>†</sup> Fml2 and Fml1 are paralogs, and therefore have the potential to be functionally redundant with each other. We included the *fml1Δfml2Δ* double mutant in our analysis to test this possibility.

**Table S2.** Frequency of gene conversion and crossing over in the *ura4<sup>+</sup>-aim2 – ade6 – his3<sup>+</sup>-aim* interval. The values are the means from *n* independent crosses and the values in brackets are the standard deviations. The number of Ade<sup>+</sup> recombinants tested is indicated, as is the total number of viable spores analyzed for crossing over between *ura4<sup>+</sup>-aim2* and *his3<sup>+</sup>-aim*. *ade6-3083* is a known hot spot for recombination and therefore acts predominantly as a recipient of genetic information, this and the order of markers explains the disparity between P1/R1 and P2/R2 classes. CentiMorgan (cM) are calculated from the accumulated data of the independent crosses, not from the mean values, using the mapping function of Haldane. *P* values are calculated by a two-tailed Mann-Whitney U test against the data from the wild-type cross (ALP733 × ALP731).

| Cross                        |                             |          | % ade <sup>+</sup>                 |                         |                                        |                                        |                                        |                                        |        | Crossovers (CO)                |       |
|------------------------------|-----------------------------|----------|------------------------------------|-------------------------|----------------------------------------|----------------------------------------|----------------------------------------|----------------------------------------|--------|--------------------------------|-------|
| strain                       | genotype                    | <i>n</i> | Frequency of ade <sup>+</sup> in % | ade <sup>+</sup> tested | ura <sup>+</sup> his <sup>+</sup> (P1) | ura <sup>+</sup> his <sup>-</sup> (P2) | ura <sup>-</sup> his <sup>-</sup> (R1) | ura <sup>+</sup> his <sup>+</sup> (R2) | tested | Frequency of CO in %           | cM    |
| ALP733 × ALP731              | wild type                   | 21       | 1.371<br>(0.515)                   | 4,014                   | 4.3<br>(3.14)                          | 35.34<br>(6.92)                        | 58.18<br>(5.71)                        | 2.18<br>(1.47)                         | 3,265  | 13.424<br>(5.33)               | 15.83 |
| ALP1133 × MCW4718            | <i>fml1Δ</i>                | 12       | 1.171 <sup>a</sup><br>(0.329)      | 2,069                   | 5.17 <sup>b</sup><br>(1.62)            | 22.69 <sup>b</sup><br>(2.96)           | 70.6 <sup>b</sup><br>(2.53)            | 1.55 <sup>b</sup><br>(0.57)            | 2,091  | 13.157 <sup>c</sup><br>(2.545) | 15.52 |
| ALP1255 × ALP1231            | <i>fml1-K99R</i>            | 11       | 1.681 <sup>d</sup><br>(0.201)      | 3,200                   | 6.45 <sup>e</sup><br>(1.3)             | 20.99 <sup>e</sup><br>(3.03)           | 70.57 <sup>e</sup><br>(2.91)           | 1.99 <sup>e</sup><br>(0.64)            | 2,123  | 18.108 <sup>f</sup><br>(5.076) | 21.86 |
| ALP1277 × ALP1274            | <i>mhf1Δ</i>                | 10       | 0.891 <sup>e</sup><br>(0.248)      | 1,326                   | 4.22 <sup>h</sup><br>(1.83)            | 28.31 <sup>h</sup><br>(4.91)           | 65.79 <sup>h</sup><br>(5.61)           | 1.68 <sup>h</sup><br>(0.84)            | 1,552  | 13.838 <sup>i</sup><br>(4.171) | 15.78 |
| ALP1278 × ALP1276            | <i>mhf2Δ</i>                | 12       | 0.984 <sup>j</sup><br>(0.204)      | 1,513                   | 5.22 <sup>k</sup><br>(2.41)            | 25.8 <sup>k</sup><br>(4.81)            | 65.86 <sup>k</sup><br>(6.37)           | 3.12 <sup>k</sup><br>(1.47)            | 1,689  | 15.266 <sup>l</sup><br>(5.532) | 20.14 |
| ALP800 × ALP782              | <i>sfr1Δ-2</i>              | 10       | 0.11 <sup>m</sup><br>(0.026)       | 2,429                   | 3.66 <sup>n</sup><br>(1.6)             | 43.94 <sup>n</sup><br>(2.93)           | 49.43 <sup>n</sup><br>(2.51)           | 2.96 <sup>n</sup><br>(1.88)            | 2,486  | 2.664 <sup>o</sup><br>(1.838)  | 2.73  |
| ALP1134 × MCW4719            | <i>fml1Δ sfr1Δ-2</i>        | 12       | 0.096 <sup>p</sup><br>(0.021)      | 2,313                   | 4.0 <sup>q</sup><br>(1.39)             | 25.84 <sup>q</sup><br>(3.51)           | 68.17 <sup>q</sup><br>(3.78)           | 1.99 <sup>q</sup><br>(0.85)            | 2,484  | 3.396 <sup>r</sup><br>(2.046)  | 3.63  |
| ALP802 × ALP822              | <i>mus81Δ<sup>s</sup></i>   | 10       | 0.227 <sup>s</sup><br>(0.085)      | 46                      | 2.0 <sup>t</sup><br>(6.32)             | 94.89 <sup>t</sup><br>(11.1)           | 0.0 <sup>t</sup>                       | 3.11 <sup>t</sup><br>(9.85)            | 1,115  | 1.932 <sup>u</sup><br>(1.399)  | 2.06  |
| ALP824 × ALP823              | <i>mus81Δ sfr1Δ-2</i>       | 19       | 0.029 <sup>v</sup><br>(0.009)      | 745                     | 1.04 <sup>w</sup><br>(1.56)            | 92.56 <sup>w</sup><br>(5.88)           | 5.61 <sup>w</sup><br>(5.4)             | 0.8 <sup>w</sup><br>(1.55)             | 3,178  | 3.179 <sup>x</sup><br>(2.596)  | 2.85  |
| ALP1365 × ALP1364 or MCW4720 | <i>fml1Δ mus81Δ sfr1Δ-2</i> | 11       | <0.00005 <sup>y</sup>              | n. a.                   |                                        |                                        |                                        |                                        | 1,509  | 1.269 <sup>z</sup><br>(1.056)  | 1.34  |
| MCW6074 × MCW6075            | <i>mhf1Δ mhf2Δ</i>          | 8        | 0.792 <sup>A</sup><br>(0.184)      | 1,269                   | 4.18 <sup>B</sup><br>(3.76)            | 25.13 <sup>B</sup><br>(4.08)           | 64.72 <sup>B</sup><br>(10.04)          | 5.97 <sup>B</sup><br>(5.4)             | 1,6199 | 19.46 <sup>C</sup><br>(4.669)  | 25.36 |
| ALP1318 × ALP1317            | <i>fml1Δ mhf1Δ mhf2Δ</i>    | 6        | 0.914 <sup>D</sup><br>(0.08)       | 1,107                   | 3.61 <sup>E</sup><br>(1.87)            | 27.29 <sup>E</sup><br>(2.88)           | 58.41 <sup>E</sup><br>(4.74)           | 10.69 <sup>E</sup><br>(0.74)           | 1,308  | 21.272 <sup>F</sup><br>(7.999) | 26.36 |
| ALP1545 ×                    | <i>dmc1Δ-12</i>             | 6        | 0.509 <sup>G</sup>                 | 1,045                   | 3.09 <sup>H</sup>                      | 34.29 <sup>H</sup>                     | 60.68 <sup>H</sup>                     | 1.94 <sup>H</sup>                      | 1,164  | 6.821 <sup>I</sup>             | 7.29  |

|         |               |    |                    |       |                   |                    |                    |                   |       |                     |       |
|---------|---------------|----|--------------------|-------|-------------------|--------------------|--------------------|-------------------|-------|---------------------|-------|
| ALP1544 |               |    | (0.058)            |       | (1.8)             | (4.7)              | (4.21)             | (0.94)            |       | (2.423)             |       |
| ALP1092 | <i>slx1Δ</i>  | 12 | 0.712 <sup>k</sup> | 2,975 | 5.25 <sup>l</sup> | 32.03 <sup>l</sup> | 59.16 <sup>l</sup> | 3.56 <sup>l</sup> | 4,837 | 14.787 <sup>m</sup> | 20.08 |
| ×       |               |    | (0.288)            |       | (2.11)            | (3.41)             | (3.79)             | (0.94)            |       | (5.087)             |       |
| ALP1091 |               |    |                    |       |                   |                    |                    |                   |       |                     |       |
| ALP1104 | <i>rad16Δ</i> | 12 | 1.205 <sup>n</sup> | 3,545 | 3.94 <sup>o</sup> | 34.39 <sup>o</sup> | 59.35 <sup>o</sup> | 2.33 <sup>o</sup> | 3,118 | 15.856 <sup>p</sup> | 19.29 |
| ×       |               |    | (0.245)            |       | (1.19)            | (2.37)             | (2.93)             | (1.18)            |       | (2.988)             |       |
| ALP1103 |               |    |                    |       |                   |                    |                    |                   |       |                     |       |

<sup>a</sup>  $P = 0.41$ , not significant; <sup>b</sup>  $P = 2.897 \times 10^{-6}$ , highly significant; <sup>c</sup>  $P = 1.0$ , not significant.

<sup>d</sup>  $P = 0.159$ , not significant; <sup>e</sup>  $P = 5.549 \times 10^{-6}$ , highly significant; <sup>f</sup>  $P = 0.041$ , significant at an  $\alpha$ -level of 0.05.

<sup>g</sup>  $P = 0.025$ , significant at an  $\alpha$ -level of 0.05; <sup>h</sup>  $P = 0.007$ , highly significant; <sup>i</sup>  $P = 0.899$ , not significant.

<sup>j</sup>  $P = 0.061$ , significant at an  $\alpha$ -level of 0.1; <sup>k</sup>  $P = 2.449 \times 10^{-4}$ , highly significant; <sup>l</sup>  $P = 0.575$ , not significant.

<sup>m</sup>  $P = 9.12 \times 10^{-6}$ , highly significant; <sup>n</sup>  $P = 8.427 \times 10^{-4}$ , highly significant; <sup>o</sup>  $P = 9.12 \times 10^{-6}$ , highly significant.

<sup>p</sup>  $P = 2.412 \times 10^{-6}$ , highly significant; <sup>q</sup>  $P = 3.884 \times 10^{-5}$ , highly significant; <sup>r</sup>  $P = 7.093 \times 10^{-6}$ , highly significant.

<sup>s</sup>  $P = 9.12 \times 10^{-6}$ , highly significant; <sup>t</sup>  $P = 9.12 \times 10^{-6}$ , highly significant; <sup>u</sup>  $P = 9.12 \times 10^{-6}$ , highly significant; <sup>s,t,u</sup> data is corrected for skewed random assortment of unlinked markers, as described previously (12).

<sup>v</sup>  $P = 6.54 \times 10^{-8}$ , highly significant; <sup>w</sup>  $P = 6.54 \times 10^{-8}$ , highly significant; <sup>x</sup>  $P = 2.861 \times 10^{-7}$ , highly significant; <sup>x</sup> data is corrected for strongly distorted crossing over frequencies.

<sup>y</sup> This is an estimate, there were no *ade*<sup>+</sup> colonies among 32,276 plated spores; <sup>z</sup>  $P = 4.592 \times 10^{-6}$ , highly significant.

<sup>A</sup>  $P = 5.021 \times 10^{-3}$ , highly significant; <sup>B</sup>  $P = 1.28 \times 10^{-3}$ , highly significant; <sup>C</sup>  $P = 0.017$ , significant at an  $\alpha$ -level of 0.05.

<sup>D</sup>  $P = 0.162$ , not significant; <sup>E</sup>  $P = 4.267 \times 10^{-3}$ , highly significant; <sup>F</sup>  $P = 0.031$ , significant at an  $\alpha$ -level of 0.05.

<sup>G</sup>  $P = 2.386 \times 10^{-4}$ , highly significant; <sup>H</sup>  $P = 0.382$ , not significant; <sup>I</sup>  $P = 7.301 \times 10^{-3}$ , highly significant. Although *dmc1Δ* shows moderate, but highly significant reductions in gene conversion at *ade6* and crossing over between *ura4*<sup>+</sup>-*aim2* – *his3*<sup>+</sup>-*aim*, it does not influence the CO/NCO-ratio associated with a gene conversion event. This indicates that *Dmc1* is involved in choosing the homologous chromosome over the sister chromatid as a template (as previously discussed (32, 33)), but does not impinge on the CO/NCO-decision once an extended D loop is formed.

<sup>k</sup>  $P = 7.567 \times 10^{-4}$ , highly significant; <sup>l</sup>  $P = 0.262$ , not significant; <sup>m</sup>  $P = 0.389$ , not significant.

<sup>n</sup>  $P = 0.389$ , not significant; <sup>o</sup>  $P = 0.765$ , not significant; <sup>p</sup>  $P = 0.217$ , not significant.

<sup>s</sup> data from Ref. (18)

**Table S3.** Frequency of gene conversion and crossing over in the *ura4*<sup>+</sup>-*aim2* – *ade6* – *his3*<sup>+</sup>-*aim* interval. The values are the means from *n* independent crosses and the values in brackets are the standard deviations. The number of *Ade*<sup>+</sup> recombinants tested is indicated, as is the total number of viable spores analyzed for crossing over between *ura4*<sup>+</sup>-*aim2* and *his3*<sup>+</sup>-*aim*. *ade6-M375* is a known cold spot for meiotic DSB formation. Nevertheless recombination induced at this site causes a disparity between P1/R1 and P2/R2 classes, since *ade6-M375* is the recipient of genetic information. CentiMorgan (cM) are calculated from the accumulated data of the independent crosses, not from the mean values, using the mapping function of Haldane. *P* values are calculated by a two-tailed Mann-Whitney U test against the data from the wild-type cross (ALP1541 × ALP731).

| Cross   |              | <i>n</i> | Frequency of <i>ade</i> <sup>+</sup> in % | <i>ade</i> <sup>+</sup> tested | % <i>ade</i> <sup>+</sup>                            |                                                      |                                                      |                                                      | tested | Crossovers (CO)      |       |
|---------|--------------|----------|-------------------------------------------|--------------------------------|------------------------------------------------------|------------------------------------------------------|------------------------------------------------------|------------------------------------------------------|--------|----------------------|-------|
| strain  | genotype     |          |                                           |                                | <i>ura</i> <sup>+</sup> <i>his</i> <sup>+</sup> (P1) | <i>ura</i> <sup>+</sup> <i>his</i> <sup>-</sup> (P2) | <i>ura</i> <sup>-</sup> <i>his</i> <sup>-</sup> (R1) | <i>ura</i> <sup>+</sup> <i>his</i> <sup>+</sup> (R2) |        | Frequency of CO in % | cM    |
| ALP1541 | wild type    | 6        | 0.0278                                    | 1,053                          | 6.39                                                 | 34.44                                                | 56.74                                                | 2.42                                                 | 1,083  | 10.075               | 11.70 |
| ×       |              |          | (0.0036)                                  |                                | (2.46)                                               | (2.66)                                               | (4.45)                                               | (0.62)                                               |        | (3.539)              |       |
| ALP731  |              |          |                                           |                                |                                                      |                                                      |                                                      |                                                      |        |                      |       |
| MCW1832 | <i>fml1Δ</i> | 6        | 0.0474 <sup>a</sup>                       | 1,166                          | 7.5 <sup>b</sup>                                     | 24.62 <sup>b</sup>                                   | 65.32 <sup>b</sup>                                   | 2.57 <sup>b</sup>                                    | 1,155  | 14.988 <sup>c</sup>  | 17.68 |
| ×       |              |          | (0.0105)                                  |                                | (0.87)                                               | (1.39)                                               | (2.16)                                               | (0.95)                                               |        | (3.558)              |       |
| MCW1785 |              |          |                                           |                                |                                                      |                                                      |                                                      |                                                      |        |                      |       |

<sup>a</sup>  $P = 0.025$ , significant at an  $\alpha$ -level of 0.05; <sup>b</sup>  $P = 0.004$ , highly significant; <sup>c</sup>  $P = 0.055$ , significant at an  $\alpha$ -level of 0.1.

**Table S4.** Frequency of crossing over in the *his1-102 – leu2-120 – lys7-2* interval. The values are the means from *n* independent crosses, the values in brackets are the standard deviations. The total number of viable spores analyzed for crossing over between *his1* and *leu2*, *leu2* and *lys7*, as well as *his1* and *lys7*. Since *leu2* is located inbetween *his1* and *lys7*, the segregation pattern of *leu2-120* in these crosses was used to determine the frequency of double crossovers in the *his1 – lys7* interval. CentiMorgan (cM) are calculated from the accumulated data of the independent crosses, not from the mean values, using the mapping function of Haldane. *P* values are calculated by a two-tailed Mann-Whitney U test against the data from the wild-type cross (ALP996 × ALP1002).

| Cross                   |              | <i>n</i> | tested | Crossovers (CO)                    |          |                                  |          |                                                         |          |
|-------------------------|--------------|----------|--------|------------------------------------|----------|----------------------------------|----------|---------------------------------------------------------|----------|
| strain                  | genotype     |          |        | <i>his1-102</i><br><i>leu2-120</i> |          | <i>leu2-120</i><br><i>lys7-2</i> |          | <i>his1-102</i><br>( <i>leu2-120</i> )<br><i>lys7-2</i> |          |
| ALP996<br>×<br>ALP1002  | wild type    | 5        | 723    | 16.393 %<br>(1.614)                | 19.96 cM | 10.868 %<br>(1.409)              | 12.15 cM | 25.899 %<br>(1.469)                                     | 36.42 cM |
| ALP1014<br>×<br>ALP1017 | <i>fml1Δ</i> | 5        | 825    | 21.244 % <sup>a</sup><br>(1.733)   | 27.39 cM | 13.689 % <sup>b</sup><br>(3.544) | 15.51 cM | 32.133 % <sup>c</sup><br>(3.841)                        | 50.08 cM |

<sup>a</sup> *P* = 0.008, highly significant; <sup>b</sup> *P* = 0.151, not significant; <sup>c</sup> *P* = 0.032, significant at an  $\alpha$ -level of 0.05.



**Table S5. Spore viability**

| <i>strain</i>                       | <i>cross</i>                          | spore viability in % of plated spores, numbers in brackets are spores plated/experiment <sup>a</sup> |                   |                  |                  |                   |                  |                  |                  |                  |                   | Mean ± s.d. <sup>a</sup> |
|-------------------------------------|---------------------------------------|------------------------------------------------------------------------------------------------------|-------------------|------------------|------------------|-------------------|------------------|------------------|------------------|------------------|-------------------|--------------------------|
| WT                                  | ALP714 × ALP688                       | 61.41<br>(894)                                                                                       | 73.85<br>(891)    | 82.4<br>(915)    | 75.41<br>(915)   | 59.68<br>(930)    | 102.7<br>(888)   | 80.6<br>(897)    | 80.35<br>(921)   | 91.32<br>(1,371) | 61.5<br>(891)     | 76.92 ± 13.8<br>(9,513)  |
| <i>fml1Δ</i>                        | ALP989 × ALP990                       | 89.44<br>(900)                                                                                       | 72.05<br>(891)    | 69.16<br>(921)   | 76.46<br>(909)   | 59.42<br>(924)    | 60.82<br>(906)   | 64.09<br>(891)   | 68.2<br>(915)    | 63.29<br>(888)   | 102.96<br>(879)   | 72.59 ± 13.84<br>(9,024) |
| <i>fml1-K99R</i>                    | ALP1255 × ALP1231                     | 68.14<br>(948)                                                                                       | 55.79<br>(864)    | 56.37<br>(1,020) | 50.61<br>(903)   | 68.31<br>(975)    | 57.19<br>(918)   | 65.42<br>(1,044) | 65.73<br>(966)   | 59.16<br>(999)   | 57.85<br>(987)    | 60.46 ± 6.04<br>(9,624)  |
| <i>sfr1Δ-2</i>                      | ALP797 × ALP775                       | 54.75<br>(1,527)                                                                                     | 57.84<br>(861)    | 55.95<br>(924)   | 47.15<br>(2,859) | 41.49<br>(1,239)  | 48.32<br>(1,341) | 41.19<br>(1,272) | 38.51<br>(1,332) | 53.14<br>(1,449) | 43.6<br>(1,383)   | 48.19 ± 6.92<br>(14,187) |
| <i>fml1Δ sfr1Δ-2</i>                | ALP1135 × ALP1136                     | 36.95<br>(1,356)                                                                                     | 47.32<br>(1,380)  | 41.59<br>(1,380) | 33.58<br>(1,212) | 53.22<br>(1,287)  | 40.55<br>(1,344) | 54.82<br>(1,182) | 33.57<br>(1,248) | 51.65<br>(1,179) | 43.5<br>(1,269)   | 43.68 ± 7.86<br>(12,837) |
| <i>mus81Δ</i>                       | ALP812 × ALP813                       | 3.47<br>(132,600)                                                                                    | 4.88<br>(133,200) | 2.61<br>(32,400) | 2.99<br>(60,900) | 1.08<br>(45,000)  | 0.82<br>(24,000) | 1.25<br>(25,200) | 0.65<br>(27,000) | 0.33<br>(27,000) | 0.39<br>(54,000)  | 1.85 ± 1.55<br>(561,300) |
| <i>mus81Δ sfr1Δ-2</i>               | ALP820 × ALP814                       | 38.60<br>(2,184)                                                                                     | 28.27<br>(4,563)  | 27.34<br>(5,508) | 20.77<br>(3,510) | 21.34<br>(3,276)  | 46.04<br>(2,541) | 32.55<br>(2,160) | 38.29<br>(2,220) | 26.07<br>(2,562) | 29.7<br>(2,566)   | 30.9 ± 8.06<br>(31,090)  |
| <i>fml1Δ mus81Δ sfr1Δ-2</i>         | ALP1167 × ALP1168                     | 5.35<br>(24,000)                                                                                     | 4.45<br>(36,000)  | 1.77<br>(37,050) | 1.2<br>(37,800)  | 1.4<br>(43,500)   | 2.96<br>(37,950) | 0.58<br>(36,000) | 1.42<br>(36,000) | 2.69<br>(38,250) | 0.71<br>(39,000)  | 2.25 ± 1.6<br>(561,300)  |
| WT + eV                             | MCW1221 × FO808<br>+ pREP41           | 64.65<br>(843)                                                                                       | 83.5<br>(921)     | 61.18<br>(912)   | 58.62<br>(911)   | 59.66<br>(870)    | 79.67<br>(915)   | 68.9<br>(894)    | 69.06<br>(918)   | 66.44<br>(885)   | 61.71<br>(888)    | 67.34 ± 8.38<br>(8,957)  |
| WT + pFml1 <sup>+</sup>             | ALP733 × FO1267<br>+ pREP41-Fml1      | 75.74<br>(672)                                                                                       | 70.54<br>(662)    | 85.76<br>(667)   | 71.72<br>(693)   | 79.56<br>(680)    | 74.16<br>(685)   | 78.81<br>(703)   | 71.12<br>(696)   | 88.24<br>(689)   | 69.66<br>(745)    | 76.53 ± 6.48<br>(6,892)  |
| WT + pFml1 <sup>++</sup>            | ALP733 × FO1267<br>+ pREP1-Fml1       | 80.79<br>(807)                                                                                       | 51.34<br>(859)    | 62.22<br>(847)   | 61.03<br>(816)   | 68.96<br>(931)    | 72.7<br>(923)    | 83.47<br>(847)   | 56.81<br>(808)   | 73.02<br>(882)   | 52.29<br>(853)    | 66.26 ± 11.32<br>(8,573) |
| WT + pFml1-K99R                     | ALP733 × FO1267<br>+ pREP1-Fml1-K99R  | 67.27<br>(828)                                                                                       | 48.85<br>(827)    | 56.28<br>(844)   | 69.96<br>(839)   | 64.48<br>(853)    | 48.22<br>(869)   | 65.33<br>(721)   | 52.94<br>(918)   | 59.31<br>(870)   | 91.6<br>(762)     | 62.42 ± 12.77<br>(8,331) |
| WT + pFml1-D196N                    | ALP733 × FO1267<br>+ pREP1-Fml1-D196N | 74.57<br>(936)                                                                                       | 64.72<br>(958)    | 62.2<br>(926)    | 57.42<br>(923)   | 63.19<br>(910)    | 55.3<br>(944)    | 62.73<br>(907)   | 60.31<br>(955)   | 52.69<br>(947)   | 71.49<br>(891)    | 62.46 ± 6.76<br>(9,297)  |
| <i>mus81Δ</i> + eV                  | MCW1238 × MCW1237<br>+ pREP41         | 0.8<br>(19,800)                                                                                      | 1.2<br>(16,200)   | 1.08<br>(16,380) | 0.33<br>(28,800) | 0.84<br>(14,700)  | 3.98<br>(33,000) | 3.85<br>(8,100)  | 3.65<br>(8,400)  | 4.43<br>(9,450)  | 3.16<br>(8,100)   | 2.33 ± 1.61<br>(162,930) |
| <i>mus81Δ</i> + pFml1 <sup>+</sup>  | ALP802 × FO1260<br>+ pREP41-Fml1      | 21.36<br>(9,800)                                                                                     | 22.93<br>(5,425)  | 18.64<br>(4,200) | 15.19<br>(5,775) | 19.32<br>(10,150) | 17.2<br>(5,075)  | 23.33<br>(4,050) | 23.65<br>(6,650) | 24.8<br>(4,025)  | 12.54<br>(6,125)  | 19.9 ± 4.04<br>(61,275)  |
| <i>mus81Δ</i> + pFml1 <sup>++</sup> | ALP802 × FO1260<br>+ pREP1-Fml1       | 18.33<br>(6,300)                                                                                     | 18.18<br>(6,150)  | 27.5<br>(5,040)  | 25.83<br>(5,280) | 19.89<br>(6,240)  | 17.1<br>(6,450)  | 15.74<br>(6,450) | 16.53<br>(5,070) | 16.27<br>(5,550) | 16.45<br>(6,000)  | 19.18 ± 4.15<br>(58,530) |
| <i>mus81Δ</i> + pFml1-K99R          | ALP802 × FO1260<br>+ pREP1-Fml1-K99R  | 0.02<br>(45,000)                                                                                     | 0.05<br>(42,000)  | 0.06<br>(44,100) | 0.05<br>(45,000) | 0.13<br>(48,000)  | 0.13<br>(43,500) | 0.12<br>(45,000) | 0.09<br>(48,300) | 0.09<br>(43,200) | 0.03<br>(46,800)  | 0.08 ± 0.04<br>(450,900) |
| <i>mus81Δ</i> + pFml1-D196N         | ALP802 × FO1260<br>+ pREP1-Fml1-D196N | 0.15<br>(39,000)                                                                                     | 0.06<br>(63,000)  | 0.13<br>(93,000) | 0.11<br>(93,000) | 0.06<br>(66,000)  | 0.05<br>(84,000) | 0.07<br>(72,000) | 0.11<br>(99,000) | 0.07<br>(93,000) | 0.07<br>(114,000) | 0.09 ± 0.03<br>(816,000) |
| <i>mus81Δ</i> + pFbh1 <sup>+</sup>  | ALP802 × FO1260<br>+ pREP41-Fbh1      | 1.55<br>(5,925)                                                                                      | 1.45<br>(7,950)   | 0.97<br>(7,500)  | 1.54<br>(7,200)  | 1.12<br>(7,800)   | 1.33<br>(9,825)  |                  |                  |                  |                   | 1.33 ± 0.24<br>(46,200)  |
| <i>mus81Δ</i> + pSrs2 <sup>+</sup>  | ALP802 × FO1260<br>+ pREP41-Srs2      | 1.28<br>(9,450)                                                                                      | 3.19<br>(6,525)   | 2.09<br>(5,700)  | 2.07<br>(6,750)  | 1.71<br>(7,650)   | 1.84<br>(6,150)  |                  |                  |                  |                   | 2.03 ± 0.64<br>(42,225)  |
| <i>mus81Δ</i> + pRqh1 <sup>+</sup>  | ALP802 × FO1260<br>+ pREP41-Rqh1      | 0.35<br>(6,000)                                                                                      | 0.6<br>(4,500)    | 0.67<br>(5,100)  | 0.35<br>(8,400)  | 0.74<br>(9,150)   | 0.91<br>(5,700)  |                  |                  |                  |                   | 0.6 ± 0.22<br>(38,850)   |
| <i>mus81Δ</i> + pFml2 <sup>+</sup>  | ALP802 × FO1260<br>+ pREP41-Fml2      | 1.33<br>(6,000)                                                                                      | 2.2<br>(4,050)    | 1.5<br>(5,850)   | 1.98<br>(5,850)  | 0.78<br>(6,000)   | 1.26<br>(9,600)  |                  |                  |                  |                   | 1.51 ± 0.51<br>(37,350)  |
| <i>rec12Δ-171</i>                   | ALP1428 × ALP1429                     | 34.47<br>(1,938)                                                                                     | 38.93<br>(1,662)  | 33.88<br>(2,010) | 26.76<br>(2,238) | 20.84<br>(1,761)  | 28.83<br>(1,644) |                  |                  |                  |                   | 30.62 ± 6.45<br>(11,253) |
| <i>rec12Δ-171 mus81Δ sfr1Δ-2</i>    | ALP1472 × ALP1473                     | 25.96                                                                                                | 27.47             | 29.66            | 38.98            | 23.19             | 30.45            |                  |                  |                  |                   | 29.28 ± 5.42             |

|                                          |                                                      |                  |                  |                  |                  |                  |                  |                  |                  |                  |                  |  |  |                           |
|------------------------------------------|------------------------------------------------------|------------------|------------------|------------------|------------------|------------------|------------------|------------------|------------------|------------------|------------------|--|--|---------------------------|
|                                          |                                                      | (1,668)          | (1,809)          | (1,740)          | (1,719)          | (1,647)          | (1,698)          |                  |                  |                  |                  |  |  | (10,281)                  |
| <i>rec12Δ-171 fml1Δ mus81Δ</i>           | ALP1470 × ALP1471                                    | 12.52<br>(2,268) | 13.47<br>(2,376) | 12.49<br>(2,409) | 12.26<br>(2,520) | 10.08<br>(2,580) |                  |                  |                  |                  |                  |  |  | 12.16 ± 1.26<br>(12,153)  |
| <i>rec12Δ-171 fml1Δ mus81Δ sfr1Δ-2</i>   | ALP1474 × ALP1475                                    | 15.83<br>(1,800) | 14.32<br>(1,836) | 15.06<br>(1,800) | 15.34<br>(1,695) | 13.29<br>(1,851) | 19.94<br>(1,710) |                  |                  |                  |                  |  |  | 15.63 ± 2.29<br>(10,692)  |
| <i>fml1Δ mus81Δ + pMus81*</i>            | ALP1170 × ALP1267<br>+ pREP41-Mus81-Eme1             | 20.53<br>(2,250) | 37.1<br>(2,418)  | 8.47<br>(2,610)  | 32.26<br>(2,430) | 15.87<br>(2,439) |                  |                  |                  |                  |                  |  |  | 22.85 ± 11.75<br>(12,147) |
| <i>fml1Δ mus81Δ + pRusA</i>              | ALP1170 × ALP1267<br>+ pREP1-rusA                    | 13.82<br>(6,000) | 6.83<br>(6,240)  | 7.19<br>(5,940)  | 7.91<br>(6,120)  | 19.37<br>(6,300) | 16.33<br>(6,105) |                  |                  |                  |                  |  |  | 11.91 ± 5.35<br>(36,705)  |
| <i>fml1Δ mus81Δ + pGEN1<sup>++</sup></i> | ALP1170 × ALP1267<br>+ pREP1-GEN1 <sup>(1-527)</sup> | 0.76<br>(5,400)  | 0.79<br>(7,200)  | 0.92<br>(5,100)  | 0.96<br>(5,400)  | 1.11<br>(4,950)  | 1.26<br>(4,200)  |                  |                  |                  |                  |  |  | 0.97 ± 0.19<br>(32,250)   |
| <i>rqh1Δ</i>                             | ALP783 × ALP784                                      | 26.17<br>(1,028) | 34.98<br>(972)   | 28.01<br>(1,389) | 36.76<br>(1,314) | 30.49<br>(1,197) | 30.69<br>(1,554) | 44.17<br>(1,560) | 21.89<br>(1,599) | 31.03<br>(2,340) | 29.98<br>(2,295) |  |  | 31.42 ± 6.12<br>(15,248)  |
| <i>srs2Δ</i>                             | MCW1017 × MCW1016<br>*FO1346 × FO1354                | 78.0<br>(600)    | 77.0<br>(600)    | 80.0<br>(600)    | 70.0*<br>(750)   | 72.0*<br>(750)   |                  |                  |                  |                  |                  |  |  | 75.4 ± 4.22<br>(3,300)    |
| <i>fml2Δ</i>                             | ALP1576 × ALP1575                                    | 74.52<br>(777)   | 53.0<br>(832)    | 49.7<br>(843)    | 79.89<br>(756)   | 79.78<br>(811)   | 90.27<br>(771)   |                  |                  |                  |                  |  |  | 71.2 ± 16.23<br>(4,790)   |
| <i>dmc1Δ-12</i>                          | ALP1545 × ALP1544                                    | 43.96<br>(1,035) | 72.66<br>(1,006) | 67.94<br>(814)   | 51.08<br>(1,016) | 82.03<br>(1,085) | 70.92<br>(1,049) |                  |                  |                  |                  |  |  | 64.77 ± 14.34<br>(6,005)  |
| <i>slx1Δ</i>                             | ALP1083 × ALP1084                                    | 85.47<br>(888)   | 86.84<br>(1,011) | 88.06<br>(1,131) | 61.92<br>(927)   | 41.08<br>(852)   | 68.33<br>(903)   | 62.98<br>(867)   | 62.6<br>(885)    | 67.02<br>(849)   | 74.48<br>(921)   |  |  | 69.88 ± 14.48<br>(9,234)  |
| <i>rad16Δ</i>                            | ALP1117 × ALP1118                                    | 60.47<br>(1,032) | 48.9<br>(912)    | 62.31<br>(918)   | 48.91<br>(963)   | 59.94<br>(996)   | 58.38<br>(978)   | 66.04<br>(963)   | 74.45<br>(1,002) | 42.49<br>(786)   | 41.67<br>(936)   |  |  | 56.36 ± 10.59<br>(9,486)  |
| <i>slx1Δ mus81Δ sfr1Δ-2</i>              | ALP1089 × ALP1090                                    | 29.88<br>(2,952) | 29.41<br>(2,928) | 30.17<br>(3,096) | 38.22<br>(2,640) | 28.51<br>(3,048) | 39.5<br>(3,000)  | 30.4<br>(2,970)  | 34.68<br>(2,970) | 29.35<br>(2,964) | 26.72<br>(2,934) |  |  | 31.68 ± 4.29<br>(29,502)  |
| <i>rad16Δ mus81Δ sfr1Δ-2</i>             | ALP1143 × ALP1144                                    | 23.35<br>(2,814) | 29.51<br>(6,228) | 28.85<br>(2,880) | 22.0<br>(3,222)  | 30.13<br>(3,030) | 34.91<br>(3,165) | 23.43<br>(2,808) | 27.71<br>(6,243) | 31.79<br>(3,108) | 33.05<br>(3,150) |  |  | 28.47 ± 4.36<br>(36,648)  |

<sup>a</sup> numbers in brackets represent total number of plated spores (n).

eV stands for empty vector.

**Table S6.** Percentage of asci formed in a mating population. Strains with different mating types were mixed together, plated onto solid sporulation media and incubated at +25°C before being inspected after 2 and 3 days under a standard light microscope, except for the *mus81Δ fml1Δ* double mutant (ALP1050 × ALP1051), which was followed for 7 days.

| Cross             |                           | <i>n</i>           | % Asci | Standard Deviation |
|-------------------|---------------------------|--------------------|--------|--------------------|
| strain            | genotype                  | total cells tested |        |                    |
| ALP714 × ALP688   | wild type                 | 1,541              | 42.93  | 1.75               |
| ALP989 × ALP990   | <i>fml1Δ</i>              | 1,167              | 34.27  | 1.76               |
| ALP812 × ALP813   | <i>mus81Δ</i>             | 1,419              | 26.69  | 1.51               |
| ALP797 × ALP775   | <i>sfr1Δ</i>              | 1,038              | 36.21  | 6.21               |
| ALP820 × ALP814   | <i>mus81Δ sfr1Δ</i>       | 1,125              | 19.90  | 5.57               |
| ALP1050 × ALP1051 | <i>fml1Δ mus81Δ</i>       | 3,929              | 0.81   | 0.45               |
| ALP1167 × ALP1168 | <i>fml1Δ mus81Δ sfr1Δ</i> | 1,383              | 10.91  | 4.19               |

**Table S7.** Distribution of DNA masses in wild-type and mutant asci with or without over-expression of wild-type and mutant Fml1. Asci were classified into five categories: (I) 4 regularly distributed DNA masses, (II) 1 DNA mass (total segregation failure), (III) more than 1 but less than 4 DNA masses (partial segregation failure), (IV) 4 irregularly distributed DNA masses (mis-segregation of chromosomes), and (V) more than 4 DNA masses (DNA fragmentation). Percentage of asci in each category is given. Strains with different mating types were mixed together, plated onto solid sporulation media and incubated at +25°C for several days. Cells were stained with Hoechst33342 and evaluated under an epifluorescence microscope. *P* values are calculated by a one-tailed Fisher's exact test against the data from the *mus81Δ* cross (ALP812 × ALP813).

| Strains crossed                      | genotype                         | n   | I      | II                  | III    | IV     | V      |
|--------------------------------------|----------------------------------|-----|--------|---------------------|--------|--------|--------|
| ALP714 × ALP688                      | <i>wild type</i>                 | 107 | 99.065 | 0.0                 | 0.0    | 0.0    | 0.935  |
| ALP989 × ALP990                      | <i>fml1Δ</i>                     | 117 | 88.034 | 0.0                 | 5.983  | 5.983  | 0.0    |
| ALP797 × ALP775                      | <i>sfr1Δ</i>                     | 127 | 29.134 | 0.787               | 20.472 | 47.244 | 2.362  |
| ALP812 × ALP813                      | <i>mus81Δ</i>                    | 113 | 0.0    | 38.938              | 47.788 | 9.735  | 3.54   |
| ALP820 × ALP814                      | <i>mus81Δ sfr1Δ</i>              | 90  | 6.667  | 2.222 <sup>a</sup>  | 23.333 | 50.0   | 17.778 |
| ALP1050 × ALP1051                    | <i>fml1Δ mus81Δ</i>              | 101 | 0.0    | 46.535 <sup>b</sup> | 43.564 | 8.911  | 0.99   |
| ALP1167 × ALP1168                    | <i>fml1Δ mus81Δ sfr1Δ</i>        | 133 | 0.0    | 40.602 <sup>c</sup> | 42.105 | 10.526 | 6.767  |
| ALP802 × FO1260 + pFml1 <sup>+</sup> | <i>mus81Δ</i> + pREP41-Fml1      | 114 | 0.0    | 22.807 <sup>d</sup> | 42.982 | 24.561 | 9.649  |
| ALP802 × FO1260 + pFml1-K99R         | <i>mus81Δ</i> + pREP1-Fml1-K99R  | 113 | 0.0    | 48.673 <sup>e</sup> | 32.743 | 14.159 | 4.425  |
| ALP802 × FO1260 + pFml1-D196N        | <i>mus81Δ</i> + pREP1-Fml1-D196N | 134 | 0.0    | 46.269 <sup>f</sup> | 35.075 | 14.925 | 3.731  |

<sup>a</sup> *P* = 4.089 × 10<sup>-12</sup>, highly significant

<sup>b</sup> *P* = 0.008, highly significant

<sup>c</sup> *P* = 0.565, not significant

<sup>d</sup> *P* = 1.278 × 10<sup>-4</sup>, highly significant

<sup>e</sup> *P* = 3.119 × 10<sup>-6</sup>, highly significant

<sup>f</sup> *P* = 0.006, highly significant

**Table S8.** Mus81 foci in Rec10-positive nuclei of wild-type and *sfr1Δ-2* strains (for details on staging of Rec10-stained linear elements see fig. S4).

|                                      | dots | threads | networks | bundles |
|--------------------------------------|------|---------|----------|---------|
| <b>wild type (ALP1524)</b>           |      |         |          |         |
| % of Mus81-positive nuclei           | 20.0 | 28.6    | 100.0    | 80.0    |
| Average number of Mus81 foci/nucleus | 0.4  | 0.67    | 19.6     | 16.4    |
| Maximum number of Mus81 foci         | 4    | 5       | 49       | 47      |
| <i>n</i>                             | 20   | 21      | 28       | 15      |
| <b><i>sfr1Δ-2</i> (ALP1540)</b>      |      |         |          |         |
| % of Mus81-positive nuclei           | 20.0 | 25.0    | 68.2     | 53.3    |
| Average number of Mus81 foci/nucleus | 0.35 | 0.45    | 5.27     | 4.53    |
| Maximum number of Mus81 foci         | 2    | 4       | 34       | 27      |
| <i>n</i>                             | 20   | 20      | 22       | 15      |

**Table S9.** Frequency of gene conversion and crossing over in the *ura4<sup>+</sup>-aim2 – ade6 – his3<sup>+</sup>-aim* interval. The values are the means from *n* independent crosses and the values in brackets are the standard deviations. The number of Ade<sup>+</sup> recombinants tested is indicated, as is the total number of viable spores analyzed for crossing over between *ura4<sup>+</sup>-aim2* and *his3<sup>+</sup>-aim*. *ade6-3083* is a known hot spot for recombination and therefore acts predominantly as a recipient of genetic information, this and the order of markers explains the disparity between P1/R1 and P2/R2 classes. CentiMorgan (cM) are calculated from the accumulated data of the independent crosses, not from the mean values, using the mapping function of Haldane. *P* values are calculated by a two-tailed Mann-Whitney U test against the data from the wild-type cross (ALP733 × FO1267 + pREP41).

| Cross                                            |                                                       |          | Frequency of ade <sup>+</sup> in % | ade <sup>+</sup> tested | % ade <sup>+</sup>                     |                                        |                                        |                                        | tested | Crossovers (CO)                |       |
|--------------------------------------------------|-------------------------------------------------------|----------|------------------------------------|-------------------------|----------------------------------------|----------------------------------------|----------------------------------------|----------------------------------------|--------|--------------------------------|-------|
| strain                                           | genotype                                              | <i>n</i> |                                    |                         | ura <sup>+</sup> his <sup>+</sup> (P1) | ura <sup>+</sup> his <sup>-</sup> (P2) | ura <sup>-</sup> his <sup>-</sup> (R1) | ura <sup>+</sup> his <sup>+</sup> (R2) |        | Frequency of CO in %           | cM    |
| ALP733<br>×<br>FO1267<br>+ pREP41                | wild type<br>+ empty vector <sup>§</sup>              | 12       | 0.803<br>(0.098)                   | 2,247                   | 2.79<br>(1.17)                         | 36.02<br>(4.11)                        | 58.29<br>(3.86)                        | 2.89<br>(2.09)                         | 2,374  | 13.628<br>(4.951)              | 15.82 |
| ALP733<br>×<br>FO1267<br>+ pFml1 <sup>+</sup>    | wild type<br>+ pREP41-Fml1                            | 12       | 0.969 <sup>a</sup><br>(0.081)      | 2,359                   | 2.05 <sup>b</sup><br>(1.05)            | 43.47 <sup>b</sup><br>(3.94)           | 51.57 <sup>b</sup><br>(3.16)           | 2.91 <sup>b</sup><br>(1.42)            | 2,470  | 10.505 <sup>c</sup><br>(2.424) | 11.87 |
| ALP733<br>×<br>FO1267<br>+ pFml1 <sup>++</sup>   | wild type<br>+ pREP1-Fml1                             | 11       | 1.055 <sup>d</sup><br>(0.119)      | 2,314                   | 3.53 <sup>e</sup><br>(1.59)            | 45.64 <sup>e</sup><br>(3.72)           | 46.57 <sup>e</sup><br>(3.89)           | 4.26 <sup>e</sup><br>(1.39)            | 2,324  | 13.889 <sup>f</sup><br>(5.265) | 16.11 |
| ALP733<br>×<br>FO1267<br>+ pFml1-<br>K99R        | wild type<br>+ pREP1-Fml1-K99R                        | 11       | 0.897 <sup>g</sup><br>(0.173)      | 1,876                   | 5.55 <sup>h</sup><br>(2.0)             | 26.72 <sup>h</sup><br>(2.76)           | 65.43 <sup>h</sup><br>(2.22)           | 2.29 <sup>h</sup><br>(0.83)            | 1,987  | 17.262 <sup>i</sup><br>(2.953) | 21.25 |
| ALP733<br>×<br>FO1267<br>+ pFml1-<br>D196N       | wild type<br>+ pREP1-Fml1-D196N                       | 12       | 1.077 <sup>j</sup><br>(0.19)       | 2,310                   | 4.96 <sup>k</sup><br>(1.59)            | 25.48 <sup>k</sup><br>(3.98)           | 67.7 <sup>k</sup><br>(3.49)            | 1.86 <sup>k</sup><br>(1.08)            | 2,545  | 15.631 <sup>l</sup><br>(2.601) | 18.76 |
| ALP802<br>×<br>FO1260<br>+ pFml1 <sup>+</sup>    | <i>mus81Δ</i><br>+ pREP41-Fml1                        | 12       | 0.52 <sup>m</sup><br>(0.102)       | 1,117                   | 1.7 <sup>n</sup><br>(1.56)             | 93.38 <sup>n</sup><br>(4.5)            | 0.8 <sup>n</sup><br>(1.56)             | 4.12 <sup>n</sup><br>(3.72)            | 2,404  | 3.086 <sup>o</sup><br>(1.465)  | 3.4   |
| ALP802<br>×<br>FO1260<br>+ pMus81 <sup>*</sup>   | <i>mus81Δ</i><br>+ pREP41-Mus81-<br>Eme1 <sup>§</sup> | 10       | 0.98 <sup>p</sup><br>(0.216)       | 1,445                   | 3.26 <sup>q</sup><br>(1.14)            | 39.33 <sup>q</sup><br>(6.9)            | 53.57 <sup>q</sup><br>(7.22)           | 3.84 <sup>q</sup><br>(2.24)            | 1,504  | 12.986 <sup>r</sup><br>(3.381) | 15.91 |
| ALP1170<br>×<br>ALP1267<br>+ pMus81 <sup>*</sup> | <i>fml1Δ mus81Δ</i><br>+ pREP41-Mus81-<br>Eme1        | 7        | 1.492 <sup>s</sup><br>(0.495)      | 532                     | 7.67 <sup>t</sup><br>(3.0)             | 22.28 <sup>t</sup><br>(4.16)           | 66.97 <sup>t</sup><br>(5.55)           | 3.08 <sup>t</sup><br>(1.78)            | 366    | 19.454 <sup>u</sup><br>(8.064) | 26.83 |
| ALP802<br>×<br>FO1260<br>+ pRusA                 | <i>mus81Δ</i><br>+ pREP1-rusA <sup>§</sup>            | 13       | 0.836 <sup>v</sup><br>(0.295)      | 2,047                   | 8.78 <sup>w</sup><br>(4.12)            | 49.36 <sup>w</sup><br>(7.21)           | 29.9 <sup>w</sup><br>(7.24)            | 11.96 <sup>w</sup><br>(6.92)           | 2,088  | 11.892 <sup>x</sup><br>(4.308) | 12.75 |
| ALP1170<br>×<br>ALP1267                          | <i>fml1Δ mus81Δ</i><br>+ pREP1-rusA                   | 12       | 0.759 <sup>y</sup><br>(0.2)        | 500                     | 11.04 <sup>z</sup><br>(5.67)           | 35.88 <sup>z</sup><br>(14.28)          | 43.71 <sup>z</sup><br>(12.17)          | 9.37 <sup>z</sup><br>(5.15)            | 4,039  | 15.852 <sup>A</sup><br>(6.77)  | 18.41 |

|                                                          |                                                         |    |                               |       |                              |                               |                              |                             |       |                                |       |
|----------------------------------------------------------|---------------------------------------------------------|----|-------------------------------|-------|------------------------------|-------------------------------|------------------------------|-----------------------------|-------|--------------------------------|-------|
| + pRusA<br>ALP802<br>×<br>FO1260<br>+ pGEN1 <sup>+</sup> | <i>mus81Δ</i><br>+ pREP41-<br>GEN1 <sup>(1-527)§</sup>  | 12 | 0.744 <sup>B</sup><br>(0.137) | 2,054 | 4.15 <sup>C</sup><br>(1.5)   | 53.59 <sup>C</sup><br>(4.72)  | 36.18 <sup>C</sup><br>(6.29) | 6.08 <sup>C</sup><br>(2.36) | 2,683 | 10.611 <sup>D</sup><br>(5.95)  | 10.73 |
| ALP1170<br>×<br>ALP1267<br>+ pGEN1 <sup>+</sup>          | <i>fml1Δ mus81Δ</i><br>+ pREP41-GEN1 <sup>(1-527)</sup> | 4  | 0.272 <sup>E</sup><br>(0.065) | 32    | 8.33 <sup>F</sup><br>(16.67) | 42.71 <sup>F</sup><br>(13.77) | 46.18 <sup>F</sup><br>(12.6) | 2.78 <sup>F</sup><br>(5.56) | 485   | 11.374 <sup>G</sup><br>(1.204) | 13.13 |
| ALP1170<br>×<br>ALP1267<br>+ pGEN1 <sup>++</sup>         | <i>fml1Δ mus81Δ</i><br>+ pREP1-GEN1 <sup>(1-527)</sup>  | 7  | 0.515 <sup>H</sup><br>(0.455) | 140   | 3.25 <sup>J</sup><br>(4.23)  | 45.96 <sup>J</sup><br>(11.11) | 44.06 <sup>J</sup><br>(8.92) | 6.73 <sup>J</sup><br>(6.78) | 1,859 | 17.388 <sup>K</sup><br>(4.415) | 20.61 |

<sup>a</sup> $P = 9.987 \times 10^{-4}$ , highly significant; <sup>b</sup> $P = 5.32 \times 10^{-4}$ , highly significant; <sup>c</sup> $P = 0.149$ , not significant.

<sup>d</sup> $P = 2.218 \times 10^{-4}$ , highly significant; <sup>e</sup> $P = 4.865 \times 10^{-5}$ , highly significant; <sup>f</sup> $P = 1.0$ , not significant.

<sup>g</sup> $P = 0.074$ , significant at an  $\alpha$ -level of 0.1; <sup>h</sup> $P = 4.513 \times 10^{-4}$ , highly significant; <sup>i</sup> $P = 0.176$ , not significant.

<sup>j</sup> $P = 5.32 \times 10^{-4}$ , highly significant; <sup>k</sup> $P = 2.755 \times 10^{-4}$ , highly significant; <sup>l</sup> $P = 0.644$ , not significant.

<sup>m</sup> $P = 4.146 \times 10^{-5}$ , highly significant; <sup>n</sup> $P = 3.226 \times 10^{-5}$ , highly significant; <sup>o</sup> $P = 4.146 \times 10^{-5}$ , highly significant.

<sup>p</sup> $P = 0.075$ , significant at an  $\alpha$ -level of 0.1; <sup>q</sup> $P = 0.187$ , not significant; <sup>r</sup> $P = 0.553$ , not significant.

<sup>s</sup> $P = 0.007$ , highly significant; <sup>t</sup> $P = 0.009$ , highly significant; <sup>u</sup> $P = 0.176$ , not significant.

<sup>v</sup> $P = 0.301$ , not significant; <sup>w</sup> $P = 2.209 \times 10^{-5}$ , highly significant; <sup>x</sup> $P = 0.301$ , not significant.

<sup>y</sup> $P = 0.119$ , not significant; <sup>z</sup> $P = 0.057$ , significant at an  $\alpha$ -level of 0.1 (tested against *mus81Δ* + pREP1-rusA:  $P = 2.0 \times 10^{-3}$ , highly significant); <sup>A</sup> $P = 0.686$ , not significant.

<sup>B</sup> $P = 0.141$ , not significant; <sup>C</sup> $P = 3.226 \times 10^{-5}$ , highly significant; <sup>D</sup> $P = 0.248$ , not significant.

<sup>E</sup> $P = 0.004$ , highly significant; <sup>F</sup> $P = 0.332$ , not significant; <sup>G</sup> $P = 0.396$ , not significant.

<sup>H</sup> $P = 0.011$ , significant at an  $\alpha$ -level of 0.05; <sup>J</sup> $P = 0.099$ , significant at an  $\alpha$ -level of 0.1; <sup>K</sup> $P = 0.128$ , not significant.

§ data from Ref. (18)

**Table S10. Strain list**

| Strain          | Relevant genotype                                                                                            | Origin     |
|-----------------|--------------------------------------------------------------------------------------------------------------|------------|
| MCW1196         | <i>h<sup>+N</sup> ade6-469 his3<sup>+</sup>-aim his3-D1 leu1-32 ura4-D18</i>                                 | Ref. (12)  |
| MCW1195         | <i>h<sup>-</sup> ade6-M26 ura4<sup>+</sup>-aim2 arg3-D4 his3-D1 ura4-D18</i>                                 | Ref. (12)  |
| MCW1832         | <i>h<sup>+N</sup> fbh1Δ::kanMX6 ade6-M26 ura4<sup>+</sup>-aim2 arg3-D4 his3-D1 leu1-32 ura4-D18</i>          | Ref. (2)   |
| MCW1785         | <i>h<sup>-</sup> fbh1Δ::kanMX6 ade6-469 his3<sup>+</sup>-aim arg3-D4 his3-D1 leu1-32 ura4-D18</i>            | Ref. (2)   |
| FO1360          | <i>h<sup>+N</sup> rqh1Δ::kanMX6 ade6-469 his3<sup>+</sup>-aim his3-D1 leu1-32 ura4-D18</i>                   | this study |
| FO1368          | <i>h<sup>-</sup> rqh1Δ::kanMX6 ade6-M26 ura4<sup>+</sup>-aim2 arg3-D4 his3-D1 ura4-D18</i>                   | this study |
| FO1346          | <i>h<sup>+N</sup> srs2Δ::kanMX6 ade6-M26 ura4<sup>+</sup>-aim2 arg3-D4 his3-D1 ura4-D18</i>                  | this study |
| FO1354          | <i>h<sup>-smf0</sup> srs2Δ::kanMX6 ade6-469 his3<sup>+</sup>-aim his3-D1 leu1-32 ura4-D18</i>                | this study |
| MCW3187         | <i>h<sup>+N</sup> fml1Δ::natMX4 ade6-469 his3<sup>+</sup>-aim his3-D1 leu1-32 ura4-D18</i>                   | this study |
| MCW3185         | <i>h<sup>-</sup> fml1Δ::natMX4 ade6-M26 ura4<sup>+</sup>-aim2 arg3-D4 his3-D1 ura4-D18</i>                   | this study |
| MCW3189         | <i>h<sup>+N</sup> fml2Δ::kanMX6 ade6-469 his3<sup>+</sup>-aim his3-D1 leu1-32 ura4-D18</i>                   | this study |
| MCW3186         | <i>h<sup>-</sup> fml2Δ::kanMX6 ade6-M26 ura4<sup>+</sup>-aim2 arg3-D4 his3-D1 ura4-D18</i>                   | this study |
| MCW3183         | <i>h<sup>+N</sup> fml1Δ::natMX4 fml2Δ::kanMX6 ade6-469 his3<sup>+</sup>-aim his3-D1 leu1-32 ura4-D18</i>     | this study |
| MCW3182         | <i>h<sup>-</sup> fml1Δ::natMX4 fml2Δ::kanMX6 ade6-M26 ura4<sup>+</sup>-aim2 arg3-D4 his3-D1 ura4-D18</i>     | this study |
| MCW3202/ALP733  | <i>h<sup>+S</sup> ade6-3083 ura4<sup>+</sup>-aim2 his3-D1 leu1-32 ura4-D18</i>                               | Ref. (18)  |
| MCW3200/ALP731  | <i>h<sup>-smf0</sup> ade6-469 his3<sup>+</sup>-aim arg3-D4 his3-D1 ura4-D18</i>                              | Ref. (18)  |
| MCW4881/ALP1133 | <i>h<sup>+S</sup> fml1Δ::hphMX4 ade6-3083 ura4<sup>+</sup>-aim2 his3-D1 leu1-32 ura4-D18</i>                 | this study |
| MCW4718/FO2608  | <i>h<sup>-smf0</sup> fml1Δ::hphMX4 ade6-469 his3<sup>+</sup>-aim arg3-D4 his3-D1 ura4-D18</i>                | this study |
| MCW5136/ALP1255 | <i>h<sup>+S</sup> fml1-K99R::natMX4 ade6-3083 ura4<sup>+</sup>-aim2 his3-D1 leu1-32 ura4-D18</i>             | this study |
| MCW5093/ALP1231 | <i>h<sup>-smf0</sup> fml1-K99R::natMX4 ade6-469 his3<sup>+</sup>-aim arg3-D4 his3-D1 ura4-D18</i>            | this study |
| MCW5185/ALP1277 | <i>h<sup>+S</sup> mhfl1Δ::kanMX6 ade6-3083 ura4<sup>+</sup>-aim2 his3-D1 leu1-32 ura4-D18</i>                | this study |
| MCW5182/ALP1274 | <i>h<sup>-smf0</sup> mhfl1Δ::kanMX6 ade6-469 his3<sup>+</sup>-aim arg3-D4 his3-D1 ura4-D18</i>               | this study |
| MCW5186/ALP1278 | <i>h<sup>+S</sup> mhf2Δ::natMX4 ade6-3083 ura4<sup>+</sup>-aim2 his3-D1 leu1-32 ura4-D18</i>                 | this study |
| MCW5184/ALP1276 | <i>h<sup>-smf0</sup> mhf2Δ::natMX4 ade6-469 his3<sup>+</sup>-aim arg3-D4 his3-D1 ura4-D18</i>                | this study |
| MCW4473/ALP996  | <i>h<sup>+N</sup> lys7-2</i>                                                                                 | this study |
| MCW4507/ALP1002 | <i>h<sup>-</sup> his1-102 leu2-120</i>                                                                       | this study |
| MCW4543/ALP1014 | <i>h<sup>+N</sup> fml1Δ::natMX4 lys7-2</i>                                                                   | this study |
| MCW4546/ALP1017 | <i>h<sup>-</sup> fml1Δ::natMX4 his1-102 leu2-120</i>                                                         | this study |
| ALP714          | <i>h<sup>+S</sup></i>                                                                                        | this study |
| ALP688          | <i>h<sup>-smf0</sup></i>                                                                                     | this study |
| MCW4475/ALP989  | <i>h<sup>+S</sup> fml1Δ::natMX4</i>                                                                          | this study |
| MCW4476/ALP990  | <i>h<sup>-smf0</sup> fml1Δ::natMX4</i>                                                                       | this study |
| MCW3497/ALP797  | <i>h<sup>+S</sup> sfr1Δ-2::natMX4</i>                                                                        | this study |
| MCW3355/ALP775  | <i>h<sup>-smf0</sup> sfr1Δ-2::natMX4</i>                                                                     | this study |
| MCW4885/ALP1135 | <i>h<sup>+S</sup> fml1Δ::hphMX4 sfr1Δ-2::natMX4</i>                                                          | this study |
| MCW4886/ALP1136 | <i>h<sup>-smf0</sup> fml1Δ::hphMX4 sfr1Δ-2::natMX4</i>                                                       | this study |
| MCW3542/ALP812  | <i>h<sup>+S</sup> mus81Δ::kanMX6</i>                                                                         | this study |
| MCW3543/ALP813  | <i>h<sup>-smf0</sup> mus81Δ::kanMX6</i>                                                                      | this study |
| MCW3587/ALP820  | <i>h<sup>+S</sup> mus81Δ::kanMX6 sfr1Δ-2::natMX4</i>                                                         | this study |
| MCW3544/ALP814  | <i>h<sup>-smf0</sup> mus81Δ::kanMX6 sfr1Δ-2::natMX4</i>                                                      | this study |
| MCW4991/ALP1167 | <i>h<sup>+S</sup> fml1Δ::hphMX4 mus81Δ::kanMX6 sfr1Δ-2::natMX4</i>                                           | this study |
| MCW4992/ALP1168 | <i>h<sup>-smf0</sup> fml1Δ::hphMX4 mus81Δ::kanMX6 sfr1Δ-2::natMX4</i>                                        | this study |
| MCW3500/ALP800  | <i>h<sup>+S</sup> sfr1Δ-2::natMX4 ade6-3083 ura4<sup>+</sup>-aim2 his3-D1 leu1-32 ura4-D18</i>               | this study |
| MCW3386/ALP782  | <i>h<sup>-smf0</sup> sfr1Δ-2::natMX4 ade6-469 his3<sup>+</sup>-aim arg3-D4 his3-D1 ura4-D18</i>              | this study |
| MCW4882/ALP1134 | <i>h<sup>+S</sup> fml1Δ::hphMX4 sfr1Δ-2::natMX4 ade6-3083 ura4<sup>+</sup>-aim2 his3-D1 leu1-32 ura4-D18</i> | this study |

|                 |                                                                                                                              |                       |
|-----------------|------------------------------------------------------------------------------------------------------------------------------|-----------------------|
| MCW4719/FO2609  | <i>h<sup>-smf0</sup> fml1Δ::hphMX4 sfr1Δ-2::natMX4 ade6-469 his3<sup>+</sup>-aim arg3-D4 his3-D1 ura4-D18</i>                | this study            |
| MCW3514/ALP802  | <i>h<sup>+S</sup> mus81Δ::kanMX6 ade6-3083 ura4<sup>+</sup>-aim2 his3-D1 leu1-32 ura4-D18</i>                                | Ref. (18)             |
| MCW3589/ALP822  | <i>h<sup>-smf0</sup> mus81Δ::kanMX6 ade6-469 his3<sup>+</sup>-aim arg3-D4 his3-D1 ura4-D18</i>                               | Ref. (18)             |
| MCW3591/ALP824  | <i>h<sup>+S</sup> mus81Δ::kanMX6 sfr1Δ-2::natMX4 ade6-3083 ura4<sup>+</sup>-aim2 his3-D1 leu1-32 ura4-D18</i>                | this study            |
| MCW3590/ALP823  | <i>h<sup>-smf0</sup> mus81Δ::kanMX6 sfr1Δ-2::natMX4 ade6-469 his3<sup>+</sup>-aim arg3-D4 his3-D1 ura4-D18</i>               | this study            |
| MCW5330/ALP1365 | <i>h<sup>+S</sup> fml1Δ::hphMX4 mus81Δ::kanMX6 sfr1Δ-2::natMX4 ade6-3083 ura4<sup>+</sup>-aim2 his3-D1 leu1-32 ura4-D18</i>  | this study            |
| MCW5329/ALP1364 | <i>h<sup>-smf0</sup> fml1Δ::hphMX4 mus81Δ::kanMX6 sfr1Δ-2::natMX4 ade6-469 his3<sup>+</sup>-aim arg3-D4 his3-D1 ura4-D18</i> | this study            |
| MCW4720/FO2610  | <i>h<sup>-smf0</sup> fml1Δ::hphMX4 mus81Δ::kanMX6 sfr1Δ-2::natMX4 ade6-469 his3<sup>+</sup>-aim arg3-D4 his3-D1 ura4-D18</i> | this study            |
| MCW4624/ALP1050 | <i>h<sup>+S</sup> fml1Δ::natMX4 mus81Δ::kanMX6</i>                                                                           | this study            |
| MCW4625/ALP1051 | <i>h<sup>-smf0</sup> fml1Δ::natMX4 mus81Δ::kanMX6</i>                                                                        | this study            |
| FO1260          | <i>h<sup>-</sup> mus81Δ::kanMX6 ade6-469 his3<sup>+</sup>-aim his3-D1 leu1-32 ura4-D18</i>                                   | lab strain; Ref. (18) |
| MCW1221         | <i>h<sup>+N</sup> arg3-D4 his3-D1 leu1-32 ura4-D18</i>                                                                       | lab strain; Ref. (34) |
| FO808           | <i>h<sup>-</sup> arg3-D4 his3-D1 leu1-32 ura4-D18</i>                                                                        | lab strain; Ref. (18) |
| FO1267          | <i>h<sup>-</sup> ade6-469 his3<sup>+</sup>-aim his3-D1 leu1-32 ura4-D18</i>                                                  | lab strain; Ref. (18) |
| MCW1238/FO909   | <i>h<sup>+N</sup> mus81Δ::kanMX6 arg3-D4 his3-D1 leu1-32 ura4-D18</i>                                                        | lab strain; Ref. (18) |
| MCW1237/FO908   | <i>h<sup>-</sup> mus81Δ::kanMX6 arg3-D4 his3-D1 leu1-32 ura4-D18</i>                                                         | lab strain; Ref. (18) |
| MCW5516/ALP1428 | <i>h<sup>+N</sup> rec12Δ-171::ura4<sup>+</sup> ura4-D18</i>                                                                  | this study            |
| MCW5517/ALP1429 | <i>h<sup>-smf0</sup> rec12Δ-171::ura4<sup>+</sup> ura4-D18</i>                                                               | this study            |
| MCW5580/ALP1472 | <i>h<sup>+N</sup> mus81Δ::kanMX6 rec12Δ-171::ura4<sup>+</sup> sfr1Δ-2::natMX4 ura4-D18</i>                                   | this study            |
| MCW5581/ALP1473 | <i>h<sup>-smf0</sup> mus81Δ::kanMX6 rec12Δ-171::ura4<sup>+</sup> sfr1Δ-2::natMX4 ura4-D18</i>                                | this study            |
| MCW5578/ALP1470 | <i>h<sup>+N</sup> fml1Δ::hphMX4 mus81Δ::kanMX6 rec12Δ-171::ura4<sup>+</sup> ura4-D18</i>                                     | this study            |
| MCW5579/ALP1471 | <i>h<sup>-smf0</sup> fml1Δ::hphMX4 mus81Δ::kanMX6 rec12Δ-171::ura4<sup>+</sup> ura4-D18</i>                                  | this study            |
| MCW5582/ALP1474 | <i>h<sup>+N</sup> fml1Δ::hphMX4 mus81Δ::kanMX6 rec12Δ-171::ura4<sup>+</sup> sfr1Δ-2::natMX4 ura4-D18</i>                     | this study            |
| MCW5583/ALP1475 | <i>h<sup>-smf0</sup> fml1Δ::hphMX4 mus81Δ::kanMX6 rec12Δ-171::ura4<sup>+</sup> sfr1Δ-2::natMX4 ura4-D18</i>                  | this study            |
| MCW4994/ALP1170 | <i>h<sup>+S</sup> fml1Δ::hphMX4 mus81Δ::kanMX6 ade6-3083 ura4<sup>+</sup>-aim2 his3-D1 leu1-32 ura4-D18</i>                  | this study            |
| MCW5169/ALP1267 | <i>h<sup>-smf0</sup> fml1Δ::hphMX4 mus81Δ::kanMX6 ade6-469 his3<sup>+</sup>-aim his3-D1 leu1-32 ura4-D18</i>                 | this study            |
| MCW5788/ALP1541 | <i>h<sup>+N</sup> ade6-M375 ura4<sup>+</sup>-aim2 his3-D1 leu1-32 ura4-D18</i>                                               | this study            |
| MCW5789/ALP1542 | <i>h<sup>+N</sup> fml1Δ::hphMX4 ade6-M375 ura4<sup>+</sup>-aim2 his3-D1 leu1-32 ura4-D18</i>                                 | this study            |
| MCW6074/FO2992  | <i>h<sup>+N</sup> mhfl1Δ::kanMX6 mhfl2Δ::natMX4 ade6-469 his3<sup>+</sup>-aim arg3-D4 his3-D1 ura4-D18</i>                   | this study            |
| MCW6075/FO2993  | <i>h<sup>-</sup> mhfl1Δ::kanMX6 mhfl2Δ::natMX4 ade6-3083 ura4<sup>+</sup>-aim2 his3-D1 leu1-32 ura4-D18</i>                  | this study            |
| MCW5234/ALP1318 | <i>h<sup>+S</sup> fml1Δ::hphMX4 mhfl1Δ::kanMX6 mhfl2Δ::natMX4 ade6-3083 ura4<sup>+</sup>-aim2 his3-D1 leu1-32 ura4-D18</i>   | this study            |
| MCW5233/ALP1317 | <i>h<sup>-smf0</sup> fml1Δ::hphMX4 mhfl1Δ::kanMX6 mhfl2Δ::natMX4 ade6-469 his3<sup>+</sup>-aim arg3-D4 his3-D1 ura4-D18</i>  | this study            |
| MCW3387/ALP783  | <i>h<sup>+S</sup> rqh1Δ::kanMX6</i>                                                                                          | this study            |
| MCW3388/ALP784  | <i>h<sup>-smf0</sup> rqh1Δ::kanMX6</i>                                                                                       | this study            |
| MCW1017/FO902   | <i>h<sup>+N</sup> srs2Δ::ura4<sup>+</sup> arg3-D4 his3-D1 leu1-32 ura4-D18</i>                                               | lab strain; Ref. (34) |
| MCW1016/FO901   | <i>h<sup>-</sup> srs2Δ::ura4<sup>+</sup> arg3-D4 his3-D1 leu1-32 ura4-D18</i>                                                | lab strain            |
| MCW6007/ALP1576 | <i>h<sup>+S</sup> fml2Δ::kanMX6 ade6-3083 ura4<sup>+</sup>-aim2 his3-D1 leu1-32 ura4-D18</i>                                 | this study            |
| MCW6006/ALP1575 | <i>h<sup>-smf0</sup> fml2Δ::kanMX6 ade6-469 his3<sup>+</sup>-aim arg3-D4 his3-D1 ura4-D18</i>                                | this study            |
| MCW5795/ALP1545 | <i>h<sup>+S</sup> dmc1Δ-12::natMX4 ade6-3083 ura4<sup>+</sup>-aim2 his3-D1 leu1-32 ura4-D18</i>                              | this study            |
| MCW5793/ALP1544 | <i>h<sup>-smf0</sup> dmc1Δ-12::natMX4 ade6-469 his3<sup>+</sup>-aim arg3-D4 his3-D1 ura4-D18</i>                             | this study            |
| MCW4794/ALP1092 | <i>h<sup>+S</sup> slx1Δ::kanMX6 ade6-3083 ura4<sup>+</sup>-aim2 his3-D1 leu1-32 ura4-D18</i>                                 | this study            |
| MCW4793/ALP1091 | <i>h<sup>-smf0</sup> slx1Δ::kanMX6 ade6-469 his3<sup>+</sup>-aim arg3-D4 his3-D1 ura4-D18</i>                                | this study            |
| MCW4816/ALP1104 | <i>h<sup>+S</sup> rad16Δ::kanMX6 ade6-3083 ura4<sup>+</sup>-aim2 his3-D1 leu1-32 ura4-D18</i>                                | this study            |
| MCW4815/ALP1103 | <i>h<sup>-smf0</sup> rad16Δ::kanMX6 ade6-469 his3<sup>+</sup>-aim arg3-D4 his3-D1 ura4-D18</i>                               | this study            |
| MCW4785/ALP1083 | <i>h<sup>+S</sup> slx1Δ::kanMX6</i>                                                                                          | this study            |
| MCW4786/ALP1084 | <i>h<sup>-smf0</sup> slx1Δ::kanMX6</i>                                                                                       | this study            |

|                 |                                                                                                                                                  |            |
|-----------------|--------------------------------------------------------------------------------------------------------------------------------------------------|------------|
| MCW4841/ALP1117 | <i>h<sup>+S</sup> rad16Δ::kanMX6</i>                                                                                                             | this study |
| MCW4842/ALP1118 | <i>h<sup>-smf0</sup> rad16Δ::kanMX6</i>                                                                                                          | this study |
| MCW4791/ALP1089 | <i>h<sup>+S</sup> mus81Δ::arg3<sup>+</sup> sfr1Δ-2::natMX4 slx1Δ::kanMX6 arg3-D4</i>                                                             | this study |
| MCW4792/ALP1090 | <i>h<sup>-smf0</sup> mus81Δ::arg3<sup>+</sup> sfr1Δ-2::natMX4 slx1Δ::kanMX6 arg3-D4</i>                                                          | this study |
| MCW4964/ALP1143 | <i>h<sup>+S</sup> mus81Δ::arg3<sup>+</sup> rad16Δ::kanMX6 sfr1Δ-2::natMX4 arg3-D4</i>                                                            | this study |
| MCW4965/ALP1144 | <i>h<sup>-smf0</sup> mus81Δ::arg3<sup>+</sup> rad16Δ::kanMX6 sfr1Δ-2::natMX4 arg3-D4</i>                                                         | this study |
| MCW5202/ALP1291 | <i>h<sup>-</sup>/h<sup>-</sup> mbs1-24/mbs1-25 pat1-114/pat1-114 ade6-M210/ade6-M216 leu1+/leu1-32 ura1+/ura1-61</i>                             | this study |
| MCW5203/ALP1292 | <i>h<sup>-</sup>/h<sup>-</sup> mbs1-24/mbs1-25 pat1-114/pat1-114 ade6-M210/ade6-M216 leu1+/leu1-32 ura1+/ura1-61</i>                             | this study |
| MCW5154/ALP1264 | <i>h<sup>-</sup>/h<sup>-</sup> fml1Δ::hphMX4/fml1Δ::hphMX4 mbs1-24/mbs1-25 pat1-114/pat1-114 ade6-M210/ade6-M216 leu1+/leu1-32 ura1+/ura1-61</i> | this study |
| MCW5155/ALP1265 | <i>h<sup>-</sup>/h<sup>-</sup> fml1Δ::hphMX4/fml1Δ::hphMX4 mbs1-24/mbs1-25 pat1-114/pat1-114 ade6-M210/ade6-M216 leu1+/leu1-32 ura1+/ura1-61</i> | this study |
| MCW5717/ALP1524 | <i>h<sup>+N</sup>/h<sup>-</sup> mus81<sup>+</sup>::13myc-kanMX6/mus81<sup>+</sup>::13myc-kanMX6 ade6-M210/ade6-M216</i>                          | this study |
| MCW5787/ALP1540 | <i>h<sup>+S</sup>/h<sup>-smf0</sup> sfr1Δ-2::natMX4/sfr1Δ-2::natMX4 mus81<sup>+</sup>::13myc-kanMX6/mus81<sup>+</sup> ade6-M210/ade6-M216</i>    | this study |
| ALP729          | <i>h<sup>+S</sup> arg3-D4 his3-D1 leu1-32 ura4-D18</i>                                                                                           | lab strain |
| MCW2575/ALP500  | <i>h<sup>+N</sup> dmc1Δ::ura4<sup>+</sup> arg3-D4 his3-D1 leu1-32 ura4-D18</i>                                                                   | lab strain |



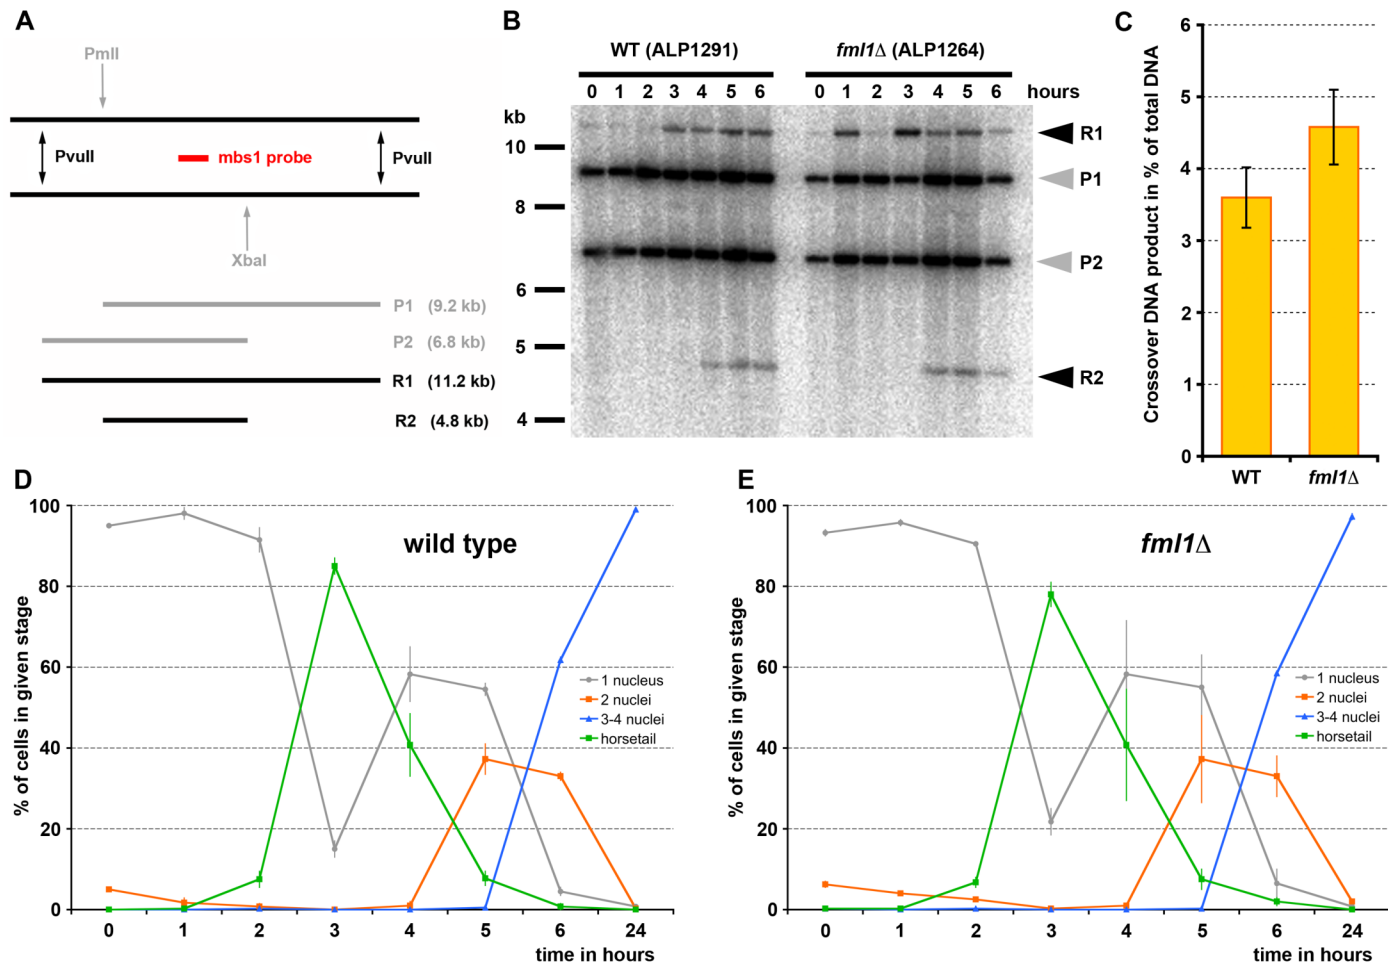

**Figure S1.** Physical assay for analyzing CO formation during meiosis. (A) Schematic of the physical meiotic recombination assay at *mbs1* on chromosome 1. The restriction sites, the position of the probe used at this locus and the sizes of the expected DNA fragments after endonuclease digestion are indicated (31). (B) Southern Blot showing diploid wild-type and *fml1*Δ meiotic *pat1-114* timecourses with CO products arising by the 4 hour timepoint following meiotic induction. (C) Quantification of the CO product at the 6 hour timepoint from Southern blots like in (B). Incomplete digestion results in a band of the same size as R1, therefore the percentage of CO recombination was calculated using  $2 \times R2 / \text{total DNA}$  (33). (D-E) Percentage of different meiotic stages evaluated with Hoechst 33342-stained cells in wild-type (ALP1291 and ALP1292) and *fml1*Δ (ALP1264 and ALP1265) timecourses (29). (C-E) Values represent the average of two independent experiments each, error bars indicate the range (experiment 1: WT = 3.18% CO and *fml1*Δ = 4.06% CO; experiment 2: WT = 4.02% CO and *fml1*Δ = 5.10% CO).

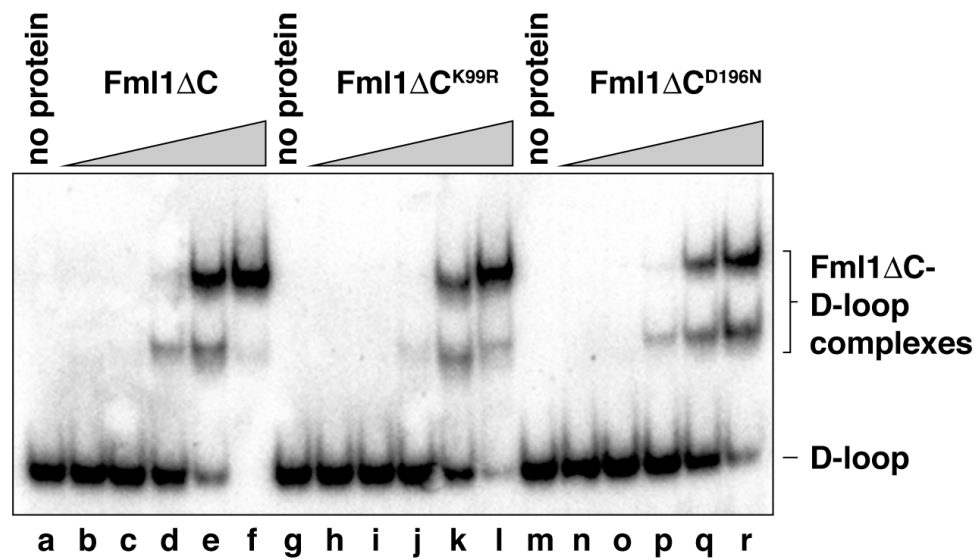

**Figure S2.** Gel retardation assay showing binding of Fml1ΔC (lanes b – f: 0.05 nM, 0.1 nM, 0.5 nM, 5 nM, and 10 nM), Fml1ΔC-K99R (lane h - l: 0.05 nM, 0.1 nM, 0.5 nM, 5 nM, and 10 nM), and Fml1ΔC-D196N (lanes n – r: 0.05 nM, 0.1 nM, 0.5 nM, 5 nM, and 10 nM) to a synthetic D loop. See Methods for further details.

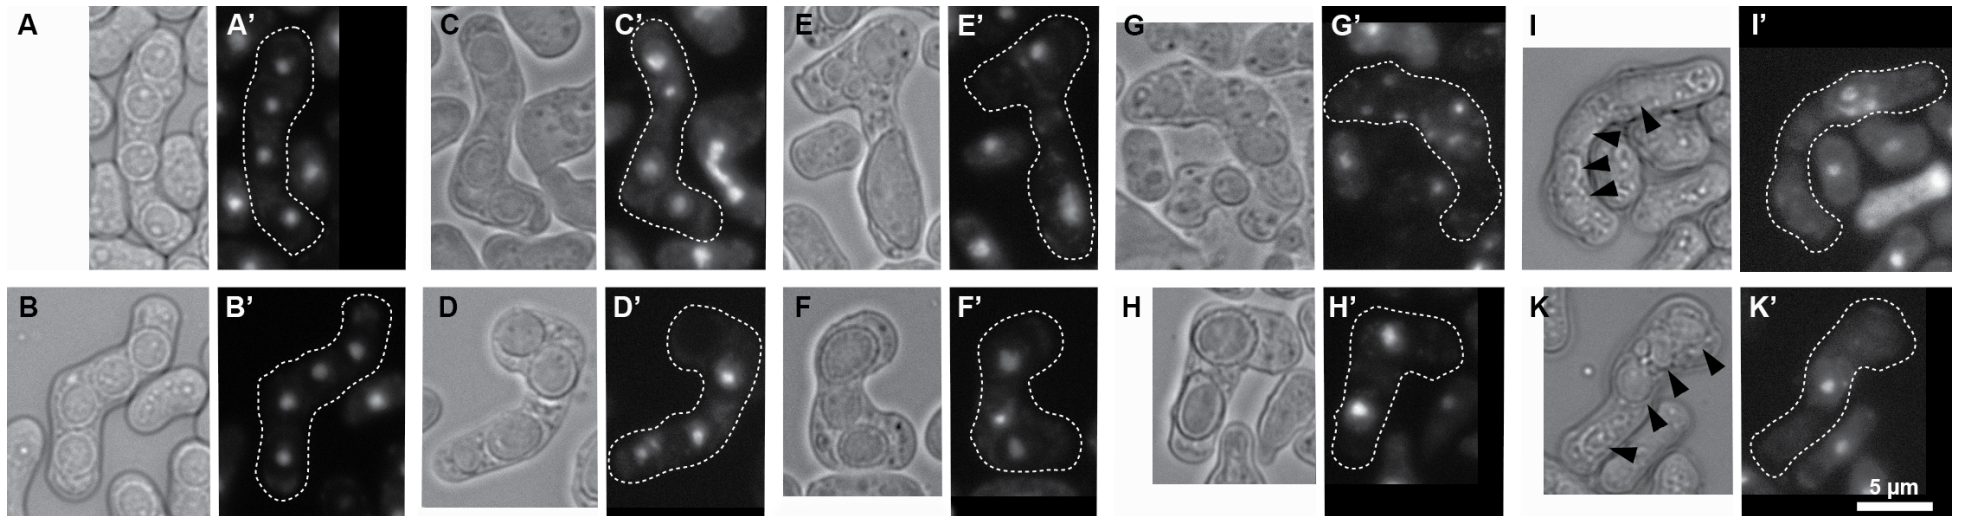

**Figure S3.** Examples of asci as evaluated in Fig. 2B. (A-K) Bright field microscopy images and (A'-K') epifluorescence microscopy images of DNA stained with Hoechst 33342. Outlines of the asci are indicated as dashed white lines. (A, A', B, B') Asci from a wild-type cross (ALP714 × ALP688) with 4 equally distributed DNA masses. (C, C') Asci from a *mus81Δ sfr1Δ-2* cross (ALP820 × ALP814) with 4 irregularly distributed DNA masses. (D, D') Asci from a *sfr1Δ-2* cross (ALP797 × ALP775) with 4 irregularly distributed DNA masses. (E, E') Asci from a *sfr1Δ-2* cross (ALP797 × ALP775) with 2 irregularly distributed DNA masses. (F, F') Asci from a *mus81Δ sfr1Δ-2* cross (ALP820 × ALP814) with 3 irregularly distributed DNA masses. (G, G') Asci from a *mus81Δ sfr1Δ-2* cross (ALP820 × ALP814) with 6 irregularly distributed DNA masses. (H, H') Asci from a *sfr1Δ-2* cross (ALP797 × ALP775) with 2 regularly distributed DNA masses. (I, I', K, K') Asci from a *mus81Δ* cross (ALP812 × ALP813) with a single DNA mass (spores with immature spore walls are indicated by arrowheads). Spore wall formation is normally initiated during meiosis II, this suggests that asci containing less than 4 spores also must have passed meiosis I and the spindle pole body duplication at the onset of meiosis II (reviewed in (35)).

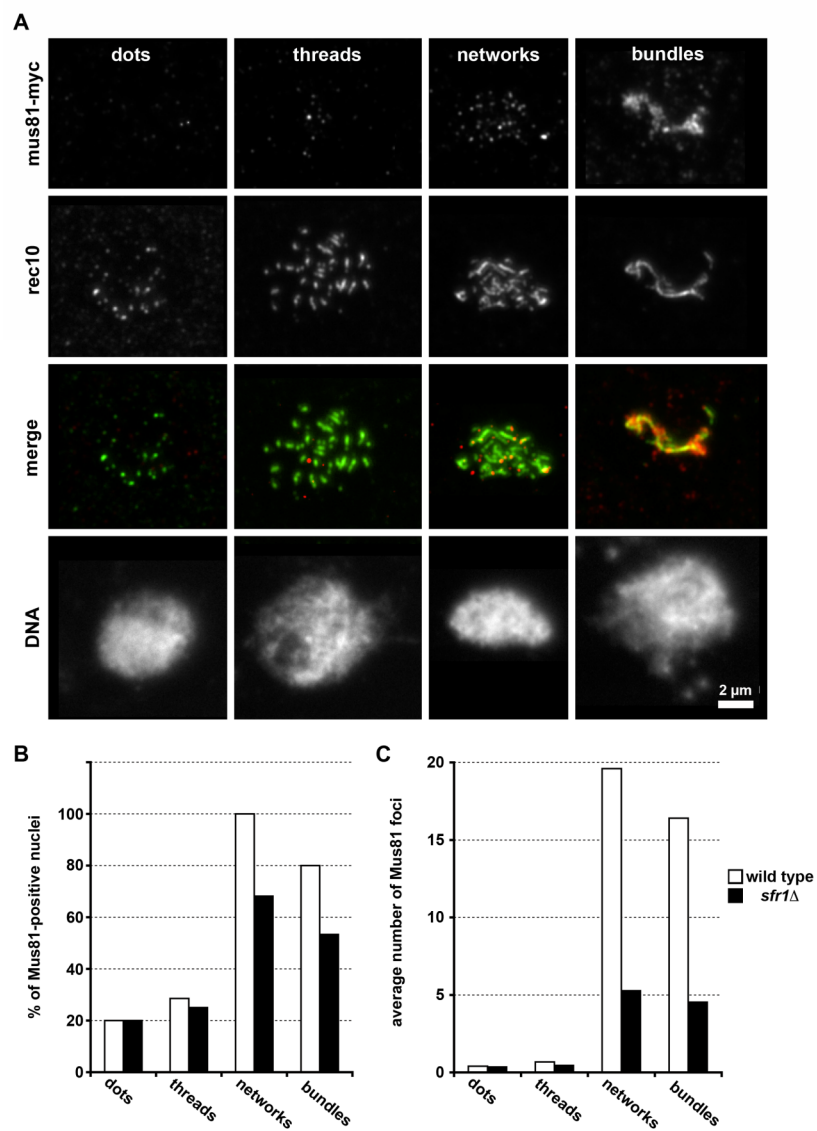

**Figure S4.** Mus81 focus formation in wild type and *sfr1*Δ-2. **(A)** Examples of Mus81 foci in Rec10-positive nuclei of each stage of linear elements from diploid wild type (ALP1524). The row labeled merge shows Rec10 in green and Mus81-13myc in red and the bottom row shows DNA stained with Hoechst 33342. The 4 stages have been shown to accumulate at different time points of a meiotic time course (dots and threads arising early, whereas networks and bundles can be found only in later time points). Rec10 also coincides and colocalizes with different recombination markers, like Rec7 and Rad51 at particular stages (30, 36). **(B)** Percentage of Mus81-positive nuclei among meiotic nuclei staged according to their linear element morphology in wild type (ALP1524) and *sfr1*Δ-2 (ALP1540). **(C)** Average number of Mus81 foci in meiotic nuclei staged according to their linear element morphology in wild type (ALP1524) and *sfr1*Δ-2 (ALP1540).

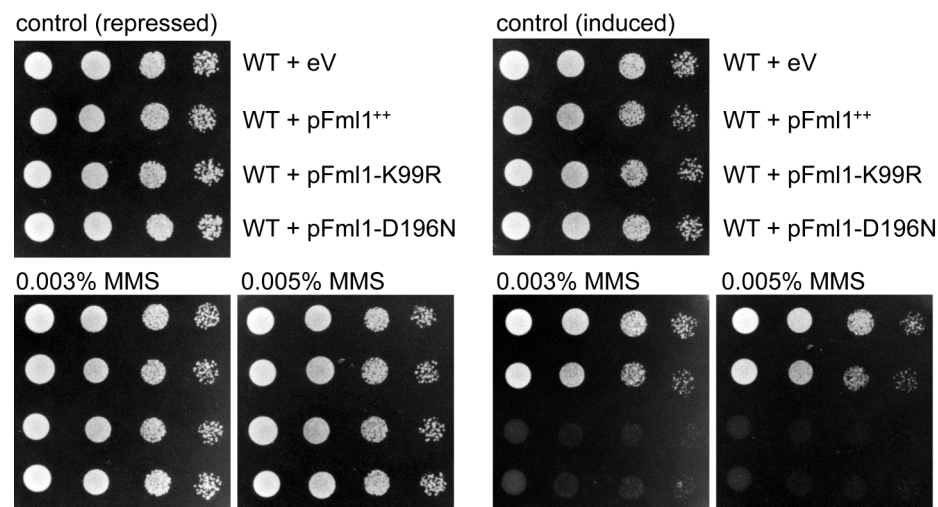

**Figure S5.** Effect of wild-type and mutant Fml1 over-expression (expressed from the thiamine-repressible *nmt1*-promotor in pREP1) on the sensitivity of a wild-type strain (MCW1221) against the alkalyting agent methyl-methanesulphonate (MMS). pREP1 serves as the empty vector (eV) control. Cells were spotted in a 10-fold dilution series (from  $10^5$  to  $10^2$  cells) onto EMMG agar containing thiamine (repressed) and MMS as indicated.

#### Supplemental References

21. S. A. Sabatinos, S. L. Forsburg, *Methods Enzymol* **470**, 759 (2010).
22. G. R. Smith, *Methods Mol Biol* **557**, 65 (2009).
23. A. L. Goldstein, J. H. McCusker, *Yeast* **15**, 1541 (1999).
24. K. Maundrell, *Gene* **123**, 127 (1993).
25. A. Lorenz, F. Osman, V. Folkyte, S. Sofueva, M. C. Whitby, *Mol Cell Biol* **29**, 4742 (2009).
26. C. L. Doe, J. Dixon, F. Osman, M. C. Whitby, *EMBO J* **19**, 2751 (2000).
27. S. C. Ip *et al.*, *Nature* **456**, 357 (2008).
28. U. Rass *et al.*, *Genes Dev* **24**, 1559 (2010).
29. J. Loidl, A. Lorenz, *Methods Mol Biol* **558**, 15 (2009).
30. A. Lorenz *et al.*, *J Cell Sci* **117**, 3343 (2004).
31. R. W. Hyppa, G. R. Smith, *Methods Mol Biol* **557**, 235 (2009).
32. A. L. Grishchuk, J. Kohli, *Genetics* **165**, 1031 (2003).
33. R. W. Hyppa, G. R. Smith, *Cell* **142**, 243 (2010).
34. F. Osman, J. Dixon, A. R. Barr, M. C. Whitby, *Mol Cell Biol* **25**, 8084 (2005).
35. C. Shimoda, *J Cell Sci* **117**, 389 (2004).
36. A. Lorenz, A. Estreicher, J. Kohli, J. Loidl, *Chromosoma* **115**, 330 (2006).
